# Supplementary material for: Inhibition of CDK4/6 Promotes CD8 T-cell Memory Formation
Source: Oxford University Press journal article supplement (doi:10.1158/2159-8290.cd-20-1540), 2021-05-03
Supplement: 21598290cd201540-sup-254328_2_supp_7081359_qs89hr.xlsx [file 21598290cd201540-sup-254328_2_supp_7081359_qs89hr.xlsx]

## Sheet: (0) CD45RA+ naive
	p_val	avg_logFC	pct.1	pct.2	p_val_adj
MAL	0	0.78739	0.869	0.74	0
LEF1	0	0.657562	0.85	0.601	0
LINC02446	0	0.655287	0.868	0.64	0
NOSIP	0	0.647305	0.961	0.782	0
ARMH1	0	0.594355	0.774	0.598	0
AIF1	0	0.551381	0.724	0.696	0
SH3YL1	0	0.518538	0.959	0.801	0
PASK	0	0.502648	0.942	0.809	0
SELL	0	0.487162	0.923	0.574	0
LDHB	0	0.486796	0.989	0.929	0
NELL2	0	0.461612	0.93	0.899	0
CCR7	0	0.453383	0.706	0.534	0
EEF1B2	0	0.432984	1	0.997	0
SESN3	0	0.431123	0.98	0.642	0
PIK3IP1	0	0.425481	0.876	0.789	0
RPS5	0	0.422281	1	0.999	0
TCF7	0	0.419007	0.859	0.67	0
RCAN3	0	0.412275	0.876	0.897	0
LEPROTL1	0	0.411846	0.989	0.935	0
TRABD2A	0	0.411259	0.653	0.615	0
IL7R	0	0.410954	0.986	0.928	0
RPS8	0	0.4075	1	0.998	0
TMEM123	0	0.406729	0.928	0.848	0
EEF1G	0	0.404009	0.999	0.997	0
SPINT2	0	0.402329	0.731	0.776	0
RPS13	0	0.393014	1	0.997	0
NDFIP1	0	0.380205	0.882	0.803	0
RPS12	0	0.368586	1	1	0
SERINC5	0	0.364017	0.698	0.598	0
RPS6	0	0.36155	1	0.999	0
RPL13	0	0.356457	1	1	0
FLT3LG	0	0.354115	0.942	0.824	0
RPL32	0	0.349688	1	1	0
FYB1	0	0.34619	0.962	0.83	0
IL6ST	0	0.336589	0.893	0.818	0
RPLP1	0	0.335386	1	1	0
PDE3B	0	0.335006	0.883	0.799	0
FOXP1	0	0.332899	0.923	0.871	0
RPS3A	0	0.328493	1	1	0
RPS18	0	0.327543	1	1	0
RPL12	0	0.321277	1	0.996	0
TXK	0	0.320446	0.73	0.735	0
RPL10A	0	0.306006	1	0.999	0
EIF2S3	0	0.305351	0.918	0.806	0
NPM1	0	0.303651	0.997	0.99	0
PABPC1	0	0.293589	1	0.997	0
MAML2	0	0.29173	0.758	0.628	0
ST3GAL1	0	0.291372	0.913	0.666	0
EIF3E	0	0.291129	0.959	0.93	0
RIC3	0	0.288321	0.851	0.782	0
RPL36	0	0.28751	1	0.995	0
RPS25	0	0.28599	1	0.999	0
DGKA	0	0.284676	0.731	0.609	0
RPLP0	0	0.284212	1	0.999	0
RGS10	0	0.279306	0.911	0.826	0
RPL36A	0	0.277758	0.998	0.981	0
CAMK4	0	0.276169	0.897	0.84	0
LTB	0	0.272939	0.993	0.938	0
RPS28	0	0.272684	1	0.996	0
RPL18A	0	0.272519	1	1	0
CD55	0	0.271932	0.843	0.818	0
RPL4	0	0.270911	0.999	0.998	0
PCSK1N	0	0.27068	0.715	0.671	0
RPS23	0	0.270461	1	0.996	0
TESPA1	0	0.270144	0.653	0.492	0
RPL37	0	0.268663	1	0.996	0
SARAF	0	0.268179	0.998	0.993	0
RPS2	0	0.266499	1	0.998	0
RPS4X	0	0.262891	1	0.996	0
RPL9	0	0.259623	1	0.999	0
RPSA	0	0.255846	1	1	0
EEF2	0	0.252903	0.999	0.997	0
RPS9	0	0.252268	0.999	0.999	0
MAF	0	-0.251742	0.8	0.808	0
OASL	0	-0.257683	0.678	0.766	0
CITED2	0	-0.262808	0.737	0.83	0
ZBTB1	0	-0.263161	0.789	0.843	0
PPP1R16B	0	-0.264657	0.849	0.876	0
ZC3H12A	0	-0.271304	0.956	0.905	0
XCL2	0	-0.271888	0.658	0.666	0
IFNGR1	0	-0.275291	0.824	0.873	0
HLA-DQA1	0	-0.282839	0.74	0.663	0
SLA2	0	-0.28296	0.508	0.77	0
F2R	0	-0.287807	0.87	0.674	0
GYG1	0	-0.288671	0.877	0.844	0
FAM177A1	0	-0.290576	0.958	0.938	0
TRBV6-4	0	-0.293738	0.624	0.745	0
CNN2	0	-0.300031	0.914	0.944	0
SH2D1A	0	-0.301889	0.543	0.637	0
VSIR	0	-0.30553	0.602	0.723	0
CD52	0	-0.305659	0.996	0.982	0
KLRC1	0	-0.305902	0.898	0.794	0
AC004687.1	0	-0.30781	0.477	0.657	0
DNAJA1	0	-0.312105	0.874	0.869	0
BTG3	0	-0.312558	0.969	0.941	0
TMSB4X	0	-0.319451	0.999	0.996	0
TRGV2	0	-0.324665	0.877	0.737	0
PTPN22	0	-0.328314	0.361	0.732	0
DNAJC1	0	-0.32914	0.611	0.673	0
RNF19A	0	-0.330816	0.906	0.863	0
CDC42EP3	0	-0.335196	0.567	0.754	0
LYST	0	-0.336895	0.86	0.808	0
REL	0	-0.341714	0.962	0.935	0
ZBP1	0	-0.346053	0.82	0.843	0
ATG2A	0	-0.346882	0.951	0.903	0
FKBP11	0	-0.348795	0.662	0.806	0
TUBB4B	0	-0.350831	0.792	0.753	0
TXN	0	-0.354232	0.748	0.773	0
S100A10	0	-0.357853	0.983	0.965	0
LGALS3	0	-0.365667	0.937	0.817	0
SPON2	0	-0.367221	0.319	0.552	0
H3F3B	0	-0.368587	1	1	0
HLA-DRA	0	-0.37151	0.863	0.73	0
PARP8	0	-0.372673	0.834	0.851	0
AOAH	0	-0.372935	0.672	0.804	0
NFKBIA	0	-0.37696	0.992	0.988	0
MRPL10	0	-0.377331	0.786	0.807	0
TNF	0	-0.378131	0.951	0.873	0
GSTP1	0	-0.379013	0.734	0.778	0
SLC7A5	0	-0.380212	0.916	0.933	0
GAPDH	0	-0.384002	1	0.998	0
YPEL5	0	-0.388287	0.953	0.952	0
TRBV5-1	0	-0.389973	0.51	0.667	0
HLA-DQB1	0	-0.390332	0.859	0.8	0
FOSL2	0	-0.39422	0.948	0.864	0
TYROBP	0	-0.396991	0.233	0.682	0
FTH1	0	-0.401152	1	1	0
MYH9	0	-0.406017	0.858	0.907	0
TUBA4A	0	-0.407081	0.576	0.764	0
YWHAQ	0	-0.407938	0.785	0.802	0
TNFRSF1B	0	-0.415054	0.748	0.754	0
SAT1	0	-0.420063	0.945	0.936	0
SPOCK2	0	-0.421876	0.92	0.969	0
EZR	0	-0.425431	0.984	0.95	0
CLIC1	0	-0.425656	0.889	0.867	0
PRDM1	0	-0.431118	0.947	0.79	0
SRRT	0	-0.431489	0.717	0.886	0
IFIT2	0	-0.433138	0.846	0.895	0
SAMD3	0	-0.433529	0.454	0.604	0
PIK3R1	0	-0.435995	0.991	0.964	0
SLC9A3R1	0	-0.438165	0.591	0.718	0
ACTN4	0	-0.440948	0.723	0.747	0
HSPA5	0	-0.443712	0.937	0.92	0
ID2	0	-0.449642	0.785	0.814	0
IFITM2	0	-0.450184	0.925	0.925	0
SYNE2	0	-0.454385	0.893	0.861	0
NCR3	0	-0.455573	0.636	0.729	0
CSRNP1	0	-0.459654	0.972	0.947	0
EML4	0	-0.460135	0.975	0.978	0
AKNA	0	-0.466951	0.623	0.811	0
S100A6	0	-0.47031	0.994	0.985	0
RUNX3	0	-0.471509	0.943	0.919	0
PRF1	0	-0.471921	0.286	0.578	0
SYNE1	0	-0.474579	0.472	0.644	0
IER2	0	-0.478798	0.969	0.927	0
EFHD2	0	-0.47988	0.431	0.628	0
CRIP1	0	-0.481353	0.953	0.899	0
APMAP	0	-0.486998	0.664	0.681	0
GNG2	0	-0.488836	0.731	0.811	0
TENT5C	0	-0.489365	0.86	0.801	0
ZNF683	0	-0.489953	0.633	0.704	0
IL32	0	-0.490704	0.992	0.985	0
LDHA	0	-0.497035	0.927	0.962	0
SYTL3	0	-0.499487	0.924	0.934	0
IDS	0	-0.507481	0.862	0.925	0
TNFAIP3	0	-0.511142	0.98	0.936	0
ARL4C	0	-0.511983	0.742	0.815	0
ZFP36	0	-0.523445	0.963	0.953	0
PPP2R5C	0	-0.524154	0.893	0.854	0
SH2D2A	0	-0.528373	0.921	0.92	0
ACTB	0	-0.533171	1	0.996	0
LCP1	0	-0.536981	0.904	0.917	0
ARPC5L	0	-0.538045	0.695	0.838	0
ZEB2	0	-0.563464	0.958	0.702	0
LITAF	0	-0.578607	0.929	0.96	0
MAP3K8	0	-0.579559	0.904	0.748	0
TGFB1	0	-0.586401	0.797	0.916	0
DDIT4	0	-0.5896	0.626	0.814	0
PFN1	0	-0.593686	0.996	0.991	0
SRSF7	0	-0.596981	0.887	0.958	0
HLA-DPB1	0	-0.599161	0.596	0.738	0
ANXA1	0	-0.603902	0.861	0.805	0
BHLHE40	0	-0.610876	0.728	0.867	0
NR4A2	0	-0.650171	0.949	0.887	0
SH3BGRL3	0	-0.651308	0.993	0.988	0
PMAIP1	0	-0.666399	0.952	0.932	0
AHNAK	0	-0.673325	0.961	0.884	0
GZMM	0	-0.679978	0.825	0.922	0
MATK	0	-0.683323	0.522	0.741	0
FYN	0	-0.70519	0.901	0.875	0
CTSW	0	-0.709166	0.963	0.984	0
CD8A	0	-0.722329	0.927	0.945	0
C12orf75	0	-0.725367	0.707	0.778	0
ITGB2	0	-0.733506	0.802	0.884	0
CCL4	0	-0.754495	0.772	0.719	0
MT2A	0	-0.792283	0.703	0.861	0
HLA-DPA1	0	-0.807619	0.724	0.768	0
FLNA	0	-0.819782	0.88	0.949	0
CMC1	0	-0.834921	0.561	0.706	0
HOPX	0	-0.869576	0.93	0.82	0
HLA-DRB1	0	-0.902789	0.361	0.694	0
SRGN	0	-0.920043	0.894	0.952	0
LYAR	0	-0.975312	0.915	0.929	0
GZMB	0	-0.984557	0.426	0.811	0
LGALS1	0	-0.999772	0.968	0.889	0
FGFBP2	0	-1.00048	0.423	0.536	0
CD74	0	-1.01561	0.944	0.97	0
S100A4	0	-1.07009	0.966	0.981	0
GZMA	0	-1.27403	0.67	0.801	0
GZMH	0	-1.47376	0.505	0.804	0
GZMK	0	-1.48027	0.798	0.888	0
DUSP2	0	-1.66947	0.899	0.936	0
KLRB1	0	-1.9017	0.945	0.951	0
CST7	0	-2.03689	0.964	0.97	0
CCL5	0	-2.48029	0.941	0.971	0
NKG7	0	-2.76396	0.745	0.926	0
GNLY	0	-3.17381	0.841	0.905	0
ADGRG1	1.63719e-307	-0.37189	0.293	0.548	3.27438e-304
CALR	3.88353e-307	-0.315436	0.79	0.84	7.76705e-304
TPM4	7.86905e-303	-0.330456	0.716	0.712	1.57381e-299
ADRB2	1.37316e-299	-0.259303	0.71	0.611	2.74632e-296
ARPC1B	5.69133e-296	-0.264361	0.897	0.875	1.13827e-292
BTG1	3.25238e-293	-0.269052	0.993	0.992	6.50476e-290
ZFP36L2	1.30642e-289	-0.33514	0.996	0.984	2.61283e-286
GLIPR2	1.5376e-278	-0.254916	0.497	0.606	3.0752e-275
DUSP1	6.45762e-274	-0.397346	0.957	0.904	1.29152e-270
PPP1R18	4.08123e-269	-0.34651	0.501	0.613	8.16247e-266
CD63	6.5452e-266	-0.345519	0.647	0.682	1.30904e-262
RNF213	1.84028e-264	-0.313895	0.702	0.767	3.68056e-261
HERPUD1	1.49525e-257	-0.316361	0.857	0.843	2.9905e-254
GADD45B	1.79302e-246	-0.353647	0.863	0.843	3.58604e-243
RASSF1	4.66252e-243	-0.3506	0.81	0.757	9.32505e-240
TGFBR3	2.07647e-237	-0.362625	0.904	0.717	4.15293e-234
ITGAL	1.89972e-233	-0.380855	0.58	0.629	3.79943e-230
B4GALT1	3.96528e-230	-0.280944	0.866	0.79	7.93056e-227
DOK2	1.95638e-225	-0.460968	0.932	0.763	3.91275e-222
CD69	1.61776e-223	-0.297984	0.99	0.977	3.23551e-220
HIST1H1E	3.55339e-221	-0.328509	0.974	0.948	7.10678e-218
CTSC	1.86194e-215	-0.363446	0.507	0.597	3.72388e-212
VPS37B	3.43344e-206	-0.252447	0.912	0.875	6.86688e-203
HIST1H1C	6.32833e-202	-0.270669	0.962	0.912	1.26567e-198
JUNB	4.71039e-197	-0.280156	0.987	0.965	9.42079e-194
MYO1G	9.21648e-197	-0.355104	0.846	0.788	1.8433e-193
TMX4	5.0654e-194	-0.268898	0.698	0.711	1.01308e-190
RHOC	5.52333e-191	-0.324312	0.892	0.713	1.10467e-187
BCL2	1.31656e-185	0.276484	0.644	0.578	2.63313e-182
S1PR5	5.46744e-184	-0.35096	0.876	0.618	1.09349e-180
ANXA2	1.08911e-179	-0.488037	0.941	0.723	2.17821e-176
CD3G	4.71978e-179	-0.258022	0.851	0.864	9.43956e-176
APOBEC3G	3.85947e-175	-0.368671	0.548	0.598	7.71895e-172
CLEC2B	2.68573e-173	-0.287639	0.978	0.913	5.37147e-170
KLRG1	3.55054e-165	-0.495605	0.831	0.675	7.10107e-162
TBX21	8.46669e-163	-0.369142	0.795	0.594	1.69334e-159
JUN	8.70144e-158	-0.298366	0.979	0.936	1.74029e-154
RORA	4.44244e-155	-0.281016	0.863	0.827	8.88488e-152
GABARAPL1	5.67273e-153	-0.329706	0.979	0.909	1.13455e-149
C1orf21	5.51446e-149	-0.282525	0.751	0.588	1.10289e-145
MSN	1.79216e-148	-0.289884	0.907	0.853	3.58432e-145
PPP1R15A	2.63854e-148	-0.318813	0.856	0.794	5.27709e-145
CYTOR	2.92829e-148	-0.477186	0.947	0.671	5.85659e-145
GPR65	1.24224e-147	-0.261125	0.779	0.748	2.48449e-144
TRBC2	5.05554e-145	-0.272113	0.915	0.902	1.01111e-141
EPHX2	2.91058e-140	0.257484	0.608	0.618	5.82116e-137
FOS	2.58305e-133	-0.382298	0.691	0.758	5.16611e-130
S100B	1.74128e-132	0.416608	0.419	0.518	3.48257e-129
MYO1F	2.30144e-129	-0.484594	0.824	0.638	4.60288e-126
H1FX	2.42789e-129	-0.306445	0.674	0.752	4.85578e-126
BRD2	3.35324e-122	-0.254203	0.754	0.748	6.70649e-119
KLF6	2.96259e-120	-0.252106	0.994	0.937	5.92518e-117
IRF1	5.01657e-114	-0.266034	0.569	0.641	1.00331e-110
CXCR4	1.13435e-110	-0.250892	0.933	0.894	2.26869e-107
CEMIP2	3.8007e-105	-0.263804	0.844	0.799	7.6014e-102
ADGRE5	1.31903e-102	-0.251552	0.734	0.732	2.63806e-99
ARAP2	5.81284e-101	-0.2693	0.785	0.691	1.16257e-97
ANXA6	9.56464e-97	-0.253308	0.792	0.769	1.91293e-93
PTMS	2.06179e-96	-0.254221	0.904	0.616	4.12357e-93
ALOX5AP	1.88016e-91	-0.266498	0.739	0.728	3.76032e-88
IL2RB	1.56176e-87	-0.315851	0.619	0.599	3.12351e-84
IL10RA	1.38606e-75	-0.255988	0.887	0.72	2.77212e-72
TPST2	2.35695e-74	-0.252516	0.507	0.539	4.71391e-71
KLRD1	2.70306e-72	-0.533765	0.888	0.583	5.40613e-69
ERN1	5.34899e-60	-0.326198	0.745	0.616	1.0698e-56
FCRL6	1.16203e-58	-0.319472	0.307	0.492	2.32407e-55
TLN1	8.42369e-56	-0.25278	0.688	0.646	1.68474e-52
ACTN1	5.80117e-35	0.276172	0.524	0.48	1.16023e-31
LAG3	1.07454e-30	-0.278322	0.94	0.766	2.14909e-27
PLEK	1.04287e-26	-0.348971	0.821	0.544	2.08573e-23
PYHIN1	9.92441e-13	-0.365734	0.727	0.554	1.98488e-09
CLIC3	5.88373e-08	-0.326148	0.566	0.516	0.000117675
GBP5	7.64946e-07	-0.266474	0.781	0.643	0.00152989
ITGB1	0.11933	-0.462752	0.916	0.655	1
FCGR3A	0.132136	-0.280559	0.28	0.412	1

## Sheet: (1) naive transitional
	p_val	avg_logFC	pct.1	pct.2	p_val_adj
FXYD2	0	0.560136	0.876	0.859	0
JUN	0	0.396288	0.978	0.938	0
TSC22D3	0	0.386353	0.975	0.928	0
NELL2	0	0.37997	0.926	0.901	0
IL7R	0	0.373809	0.979	0.932	0
KLF6	0	0.368628	0.98	0.943	0
LTB	0	0.345427	0.992	0.94	0
FLT3LG	0	0.331485	0.948	0.827	0
ARHGAP15	0	0.321263	0.908	0.826	0
CLDND1	0	0.304964	0.944	0.922	0
LGALS3	0	0.295256	0.844	0.842	0
KLRC1	0	0.278647	0.817	0.816	0
FOS	0	0.274667	0.815	0.728	0
RCAN3	0	0.268759	0.878	0.896	0
LINC02446	1.6416e-279	0.2601	0.781	0.668	3.28321e-276
LCP1	4.05026e-133	-0.250156	0.89	0.919	8.10052e-130
TGFBR3	6.99829e-118	-0.252031	0.746	0.759	1.39966e-114
AOAH	2.54019e-05	-0.253004	0.846	0.76	0.0508038
FCRL6	1.54017e-61	-0.25524	0.395	0.466	3.08035e-58
ARPC5L	1.41708e-81	-0.256779	0.807	0.808	2.83416e-78
PLEK	6.11697e-125	-0.260461	0.489	0.628	1.22339e-121
TRBV6-4	0.0214597	-0.261731	0.732	0.717	1
SLC9A3R1	1.85224e-144	-0.261743	0.619	0.707	3.70447e-141
MAP3K8	0.136131	-0.267008	0.802	0.777	1
APOBEC3G	3.94755e-132	-0.267232	0.499	0.607	7.8951e-129
PPP1R18	2.62551e-114	-0.276296	0.528	0.603	5.25102e-111
PRF1	6.22887e-92	-0.276789	0.455	0.529	1.24577e-88
HLA-DQB1	0	-0.286369	0.754	0.826	0
ACTB	0	-0.288933	1	0.996	0
SH3BGRL3	0	-0.289721	0.997	0.987	0
LDHA	2.94756e-159	-0.302991	0.934	0.959	5.89511e-156
SPON2	5.37193e-38	-0.307909	0.476	0.508	1.07439e-34
HSPA5	6.68059e-172	-0.309038	0.873	0.935	1.33612e-168
CTSC	2.33608e-180	-0.309172	0.468	0.602	4.67216e-177
MATK	3.91415e-116	-0.312909	0.663	0.702	7.8283e-113
HLA-DRA	8.93798e-49	-0.317163	0.739	0.762	1.7876e-45
S1PR5	1.19251e-50	-0.317941	0.682	0.67	2.38502e-47
ADGRG1	2.69712e-132	-0.320618	0.426	0.509	5.39424e-129
MT2A	2.10629e-109	-0.323884	0.811	0.831	4.21257e-106
C12orf75	1.82408e-129	-0.332861	0.733	0.77	3.64816e-126
KLRG1	1.34361e-255	-0.33668	0.63	0.725	2.68722e-252
FLNA	2.09455e-175	-0.339767	0.929	0.935	4.1891e-172
PFN1	0	-0.342202	0.998	0.99	0
CTSW	0	-0.345304	0.977	0.98	0
GZMK	8.51413e-94	-0.346441	0.779	0.889	1.70283e-90
APMAP	5.81839e-245	-0.350951	0.587	0.697	1.16368e-241
LGALS1	0.00779464	-0.353733	0.905	0.906	1
NCR3	1.43021e-164	-0.35602	0.638	0.725	2.86043e-161
TYROBP	8.58231e-194	-0.358303	0.548	0.595	1.71646e-190
EFHD2	2.70858e-243	-0.359067	0.489	0.607	5.41717e-240
ZEB2	2.47791e-15	-0.359724	0.811	0.744	4.95581e-12
SYNE1	1.74444e-230	-0.390919	0.516	0.627	3.48888e-227
DDIT4	2.42916e-84	-0.402036	0.745	0.781	4.85832e-81
GZMM	0	-0.402831	0.884	0.906	0
DUSP2	6.41048e-18	-0.40515	0.937	0.926	1.2821e-14
HLA-DPB1	1.03576e-287	-0.471972	0.642	0.722	2.07152e-284
HLA-DPA1	6.70921e-267	-0.53158	0.711	0.769	1.34184e-263
ITGB2	0	-0.591695	0.792	0.883	0
CMC1	1.71153e-181	-0.607055	0.641	0.683	3.42306e-178
GZMA	0	-0.613369	0.608	0.809	0
CCL4	1.93723e-110	-0.618587	0.739	0.728	3.87446e-107
CD74	0	-0.679738	0.949	0.968	0
HLA-DRB1	2.05384e-241	-0.690257	0.607	0.627	4.10768e-238
GZMB	1.46756e-11	-0.828322	0.848	0.703	2.93512e-08
GNLY	1.73156e-20	-0.861508	0.905	0.889	3.46312e-17
FGFBP2	5.0859e-243	-0.973442	0.439	0.528	1.01718e-239
CST7	0	-0.983016	0.933	0.976	0
KLRB1	0	-1.11134	0.897	0.961	0
GZMH	0	-1.36338	0.757	0.737	0
NKG7	0	-1.6828	0.842	0.898	0

## Sheet: (2) MHC II high activated CD8
	p_val	avg_logFC	pct.1	pct.2	p_val_adj
GZMK	0	1.04464	0.975	0.846	0
CMC1	0	1.02193	0.878	0.631	0
CD74	0	0.974535	0.995	0.958	0
HLA-DRB1	0	0.841736	0.85	0.573	0
DUSP2	0	0.74894	0.984	0.916	0
CST7	0	0.717293	0.994	0.963	0
PIK3R1	0	0.624509	0.989	0.965	0
HLA-DPA1	0	0.574265	0.873	0.734	0
FYN	0	0.553385	0.927	0.87	0
HLA-DQB1	0	0.542894	0.836	0.808	0
CCL5	0	0.540311	0.999	0.957	0
CCL4	0	0.525125	0.792	0.717	0
IFIT2	0	0.509886	0.941	0.872	0
HLA-DPB1	0	0.4962	0.855	0.675	0
PMAIP1	0	0.429875	0.949	0.933	0
GZMM	0	0.423113	0.959	0.889	0
HLA-DRA	0	0.415052	0.734	0.763	0
CEMIP2	0	0.406556	0.873	0.794	0
LYAR	0	0.402631	0.966	0.918	0
AOAH	0	0.401291	0.845	0.761	0
LYST	0	0.395584	0.853	0.811	0
HLA-DQA1	0	0.390658	0.728	0.669	0
XCL2	0	0.387106	0.764	0.642	0
PPP2R5C	0	0.381757	0.899	0.854	0
DNAJB1	0	0.367402	0.977	0.956	0
ZEB2	0	0.366462	0.806	0.745	0
SRGN	0	0.353702	0.964	0.934	0
COTL1	0	0.347751	0.944	0.913	0
SRRT	0	0.343934	0.929	0.833	0
HLA-DMA	0	0.342291	0.688	0.499	0
SYTL3	0	0.341821	0.959	0.925	0
TRBV12-3	0	0.341784	0.915	0.663	0
CD8A	0	0.340066	0.978	0.933	0
RGS1	0	0.334485	0.729	0.711	0
SH2D1A	1.25508e-229	0.326016	0.672	0.604	2.51015e-226
AKNA	0	0.325535	0.877	0.748	0
CD69	0	0.323342	0.987	0.978	0
TENT5C	0	0.322452	0.857	0.804	0
USP36	0	0.321747	0.958	0.904	0
MAP3K8	6.26558e-285	0.318344	0.756	0.787	1.25312e-281
ITM2A	2.53379e-299	0.316333	0.693	0.541	5.06758e-296
REL	0	0.313905	0.954	0.938	0
RNF19A	0	0.304587	0.909	0.864	0
FAM177A1	0	0.304225	0.963	0.937	0
SH2D2A	0	0.298052	0.957	0.912	0
NR4A2	0	0.297289	0.935	0.892	0
GABARAPL1	0	0.295235	0.938	0.921	0
TRBC2	0	0.293422	0.95	0.895	0
CD5	0	0.28264	0.936	0.868	0
STK17A	0	0.281554	0.855	0.8	0
ENC1	0	0.276126	0.708	0.66	0
MRPL10	0	0.272101	0.863	0.79	0
CCNH	8.10337e-261	0.268436	0.885	0.851	1.62067e-257
PPP1R16B	0	0.267662	0.919	0.86	0
KLRG1	2.3018e-156	0.262113	0.707	0.708	4.60361e-153
TUBA4A	1.86764e-271	0.255361	0.812	0.705	3.73529e-268
YPEL5	0	0.254094	0.959	0.951	0
PDCD4	4.81977e-256	0.253985	0.934	0.88	9.63955e-253
CCL4L2	0	0.251819	0.78	0.667	0
S100B	4.21818e-96	-0.250017	0.388	0.521	8.43636e-93
CTSA	0	-0.253051	0.542	0.724	0
GATA3	0	-0.253245	0.773	0.907	0
ARMH1	0.018793	-0.255042	0.685	0.624	1
BHLHE40	2.88616e-63	-0.261628	0.812	0.843	5.77233e-60
CRIP1	7.82998e-173	-0.269757	0.847	0.925	1.566e-169
HSPA8	0	-0.273729	0.926	0.952	0
NCR3	0.011443	-0.274085	0.752	0.7	1
PDE4D	0	-0.274498	0.866	0.931	0
NME2	0	-0.281778	0.876	0.942	0
DDIT4	4.34791e-05	-0.282919	0.808	0.767	0.0869582
EEF1G	0	-0.283331	0.996	0.998	0
IFITM2	1.81986e-225	-0.283422	0.887	0.934	3.63973e-222
S100A6	7.3621e-297	-0.284328	0.985	0.988	1.47242e-293
RPLP0	0	-0.286425	1	0.999	0
GZMH	1.1635e-274	-0.28834	0.815	0.724	2.32699e-271
ITGB1	0	-0.294112	0.537	0.748	0
TMEM123	2.08612e-228	-0.302922	0.848	0.869	4.17224e-225
TRBV5-1	3.54188e-150	-0.30426	0.573	0.647	7.08375e-147
TAGLN2	0	-0.304972	0.836	0.919	0
TIMP1	0	-0.30948	0.732	0.761	0
SH3YL1	0	-0.312638	0.798	0.843	0
LEF1	1.30058e-241	-0.335415	0.587	0.669	2.60117e-238
TOB1	0	-0.34497	0.741	0.822	0
RCAN3	4.29528e-255	-0.346594	0.865	0.898	8.59057e-252
PLP2	0	-0.353921	0.917	0.954	0
LDHB	0	-0.363544	0.916	0.947	0
CD52	0	-0.367072	0.983	0.986	0
VIM	0	-0.37128	0.993	0.997	0
LINC02446	1.46884e-263	-0.404901	0.604	0.707	2.93769e-260
ZNF683	1.10793e-35	-0.415227	0.785	0.668	2.21587e-32
S100A4	0	-0.438765	0.978	0.978	0
IL7R	0	-0.474604	0.907	0.947	0
FLT3LG	0	-0.492175	0.762	0.868	0
LGALS1	3.92904e-165	-0.513746	0.896	0.908	7.85808e-162
AQP3	0	-0.543147	0.715	0.756	0
KLRB1	2.64846e-46	-0.548462	0.956	0.948	5.29692e-43
MAL	9.84203e-272	-0.558854	0.809	0.758	1.96841e-268
FGFBP2	1.10669e-252	-0.593578	0.447	0.527	2.21337e-249
GZMB	0.0926827	-0.657668	0.738	0.728	1
NOSIP	0	-0.676238	0.651	0.857	0
LTB	0	-0.802423	0.933	0.953	0
GNLY	4.63898e-41	-1.88244	0.905	0.889	9.27797e-38

## Sheet: (3) CTLs
	p_val	avg_logFC	pct.1	pct.2	p_val_adj
GZMH	0	1.98628	0.991	0.696	0
GNLY	0	1.91142	0.997	0.873	0
FGFBP2	0	1.67955	0.928	0.438	0
NKG7	0	1.55077	1	0.868	0
GZMB	0	1.51198	0.932	0.693	0
LGALS1	0	1.18876	0.977	0.893	0
TRBV5-1	0	0.90202	0.958	0.576	0
GZMA	0	0.846144	0.956	0.74	0
CST7	0	0.838355	0.997	0.963	0
ITGB2	0	0.82067	0.977	0.847	0
ADGRG1	0	0.81659	0.754	0.448	0
ZNF683	0	0.782529	0.816	0.667	0
CCL5	0	0.776523	1	0.958	0
SH3BGRL3	0	0.770214	1	0.987	0
C12orf75	0	0.762288	0.912	0.736	0
S100A4	0	0.753827	0.998	0.975	0
CD8A	0	0.709482	0.99	0.932	0
EFHD2	0	0.696118	0.861	0.537	0
HLA-DPA1	0	0.674443	0.921	0.73	0
CD52	0	0.673584	0.999	0.983	0
FLNA	0	0.670539	0.976	0.927	0
PFN1	0	0.667603	0.999	0.99	0
ITGB1	0	0.665081	0.825	0.69	0
SLC9A3R1	0	0.647981	0.88	0.658	0
HLA-DPB1	0	0.644487	0.886	0.676	0
KLRB1	0	0.63223	0.99	0.943	0
ANXA1	0	0.631207	0.906	0.801	0
ZEB2	0	0.628307	0.782	0.752	0
SPON2	0	0.625407	0.688	0.469	0
TRAV20	0	0.60897	0.934	0.46	0
CCL4	0	0.603322	0.766	0.724	0
PRSS23	0	0.602308	0.657	0.402	0
AC004687.1	0	0.601081	0.9	0.569	0
FCGR3A	0	0.600306	0.635	0.34	0
CTSC	0	0.598103	0.79	0.54	0
PPP1R18	0	0.593809	0.807	0.55	0
CD8B	0	0.582365	0.975	0.877	0
HLA-DRB1	0	0.577157	0.859	0.581	0
KLRD1	0	0.571026	0.778	0.625	0
APOBEC3G	0	0.570429	0.773	0.555	0
FCRL6	0	0.568962	0.665	0.415	0
SYNE1	0	0.556514	0.817	0.57	0
ITGAL	0	0.538925	0.773	0.591	0
CTSW	0	0.525579	0.996	0.976	0
TRGV2	0	0.517343	0.869	0.748	0
PLEK	0	0.516199	0.714	0.583	0
ACTB	0	0.514462	1	0.996	0
CD3G	0	0.508633	0.935	0.848	0
MYO1F	0	0.505773	0.763	0.662	0
MATK	0	0.499648	0.862	0.665	0
AHNAK	0	0.493964	0.942	0.893	0
CRIP1	0	0.487699	0.947	0.904	0
PRF1	0	0.47561	0.791	0.467	0
ANXA6	0	0.475306	0.878	0.755	0
GSTP1	0	0.467267	0.88	0.749	0
CLIC1	0	0.466856	0.936	0.86	0
TTC38	0	0.461536	0.634	0.416	0
CYTOR	0	0.46132	0.729	0.73	0
TMSB4X	0	0.455959	1	0.996	0
IL32	0	0.450253	0.999	0.985	0
S1PR5	2.41866e-204	0.449963	0.634	0.679	4.83731e-201
ANXA2	0	0.448654	0.802	0.763	0
APMAP	0	0.445697	0.778	0.66	0
IFITM2	0	0.439386	0.96	0.919	0
S100A6	0	0.437595	0.996	0.986	0
MSN	0	0.437209	0.914	0.855	0
MYO1G	0	0.436695	0.827	0.796	0
PYHIN1	0	0.436458	0.711	0.57	0
LCP1	0	0.433255	0.949	0.908	0
LY6E	0	0.430738	0.964	0.924	0
C1orf21	1.30681e-154	0.425046	0.605	0.625	2.61362e-151
MYH9	0	0.423616	0.954	0.887	0
GZMM	0	0.421377	0.952	0.893	0
ZYX	0	0.420695	0.928	0.861	0
TGFBR3	3.88099e-170	0.415794	0.683	0.77	7.76198e-167
ZBP1	0	0.409706	0.971	0.814	0
GAPDH	0	0.402057	1	0.998	0
ITGB7	0	0.401456	0.725	0.534	0
PTMS	3.20752e-304	0.39283	0.671	0.678	6.41505e-301
SASH3	0	0.386657	0.718	0.548	0
YWHAQ	0	0.384928	0.842	0.791	0
ARPC5L	0	0.381097	0.886	0.794	0
TMSB10	0	0.379515	1	0.996	0
TPST2	3.24022e-284	0.379314	0.676	0.507	6.48044e-281
ACTN4	0	0.375372	0.793	0.733	0
ITGAM	0	0.374405	0.64	0.573	0
CLIC3	2.13064e-156	0.374198	0.624	0.51	4.26128e-153
SAMD3	5.90071e-281	0.371572	0.7	0.549	1.18014e-277
CORO1A	0	0.369561	0.973	0.953	0
TBX21	2.66514e-121	0.365803	0.619	0.64	5.33028e-118
KLRG1	1.13852e-299	0.363052	0.755	0.699	2.27705e-296
PRDM1	0	0.352264	0.892	0.811	0
MIR4435-2HG	4.96406e-20	0.341079	0.53	0.609	9.92811e-17
DOK2	9.02615e-195	0.336112	0.77	0.804	1.80523e-191
CDK2AP2	7.2017e-131	0.333981	0.562	0.365	1.44034e-127
ARPC1B	0	0.331456	0.921	0.873	0
TRGV10	0	0.330779	0.813	0.622	0
TLN1	6.16741e-184	0.319054	0.72	0.644	1.23348e-180
RHOB	0	0.318896	0.883	0.765	0
ASCL2	2.71967e-30	0.318805	0.44	0.307	5.43934e-27
TRBC2	2.54046e-290	0.318075	0.941	0.898	5.08092e-287
CD2	0	0.316339	0.829	0.73	0
S100A10	0	0.313452	0.985	0.966	0
ATP2B4	1.03689e-162	0.312911	0.639	0.587	2.07377e-159
F2R	0	0.310848	0.811	0.699	0
TOX	0	0.309455	0.883	0.67	0
CD247	3.03467e-286	0.304107	0.85	0.757	6.06934e-283
AC116366.3	1.19267e-140	0.301979	0.622	0.495	2.38534e-137
CDC42EP3	0	0.301567	0.842	0.692	0
EMP3	0	0.30094	0.95	0.9	0
PSMB10	4.79358e-218	0.30013	0.722	0.635	9.58716e-215
CDC25B	4.97039e-210	0.299509	0.77	0.677	9.94079e-207
CLEC2B	6.1825e-269	0.299108	0.933	0.926	1.2365e-265
LRRFIP1	1.26084e-225	0.29818	0.85	0.787	2.52168e-222
UPF3A	0	0.297903	0.86	0.615	0
AC004865.2	0	0.296811	0.695	0.56	0
RAB37	2.96079e-138	0.295406	0.626	0.518	5.92158e-135
ADGRE5	4.21221e-205	0.294523	0.802	0.72	8.42441e-202
MT2A	0	0.291703	0.916	0.812	0
TNFRSF1B	8.09411e-151	0.291519	0.752	0.752	1.61882e-147
RNF213	5.99717e-219	0.289838	0.815	0.742	1.19943e-215
PTPN6	1.42466e-230	0.288619	0.674	0.509	2.84933e-227
FGR	0.208972	0.286383	0.489	0.424	1
PSME2	9.08898e-238	0.285189	0.841	0.777	1.8178e-234
SELPLG	3.69728e-136	0.284496	0.623	0.522	7.39456e-133
TCIRG1	0	0.279142	0.832	0.716	0
ABHD17A	3.98901e-301	0.277584	0.711	0.516	7.97801e-298
HOPX	7.81847e-189	0.276336	0.792	0.853	1.56369e-185
SRRT	0	0.274431	0.962	0.83	0
MT1E	0	0.27283	0.801	0.671	0
CEP78	1.0889e-11	0.270008	0.514	0.471	2.1778e-08
TAP1	6.57125e-142	0.267902	0.634	0.524	1.31425e-138
PREX1	1.98567e-185	0.266521	0.743	0.699	3.97135e-182
CALR	1.0056e-190	0.264769	0.852	0.826	2.0112e-187
CASP1	2.91903e-204	0.264341	0.641	0.483	5.83807e-201
SYNE2	1.13608e-157	0.264092	0.883	0.865	2.27216e-154
CLEC2D	3.93359e-131	0.263524	0.695	0.608	7.86718e-128
GLIPR2	7.46019e-82	0.262803	0.632	0.574	1.49204e-78
CISD3	4.65898e-29	0.262444	0.538	0.47	9.31795e-26
PTGDR	4.44122e-109	0.262134	0.569	0.409	8.88243e-106
OASL	0	0.260939	0.879	0.724	0
TUBB	1.08164e-142	0.260838	0.77	0.71	2.16329e-139
PYCARD	8.74821e-79	0.259529	0.59	0.486	1.74964e-75
CHST12	1.08443e-13	0.257658	0.528	0.442	2.16886e-10
ODC1	1.20644e-195	0.256553	0.943	0.89	2.41289e-192
IFNG	0	0.255475	0.831	0.726	0
IKZF3	7.8524e-132	0.253408	0.61	0.478	1.57048e-128
CD63	1.2326e-94	0.252122	0.7	0.67	2.46519e-91
LTBP4	0	0.250516	0.82	0.6	0
S100A11	3.16157e-133	0.250208	0.631	0.468	6.32315e-130
CTSA	3.29654e-180	-0.251112	0.666	0.696	6.59308e-177
MYC	7.95836e-16	-0.254192	0.894	0.65	1.59167e-12
RPL27A	0	-0.261528	0.979	0.992	0
PTP4A1	0	-0.262156	0.919	0.941	0
RPSA	0	-0.263484	1	1	0
RPS23	0	-0.265604	1	0.997	0
FXYD2	0	-0.267678	0.974	0.842	0
RPL10	0	-0.268027	1	1	0
RPL3	0	-0.268258	0.999	1	0
TRBV6-4	4.88552e-47	-0.275124	0.822	0.701	9.77105e-44
JUND	0	-0.278124	0.651	0.856	0
RPS16	0	-0.280181	1	1	0
TXK	3.02282e-298	-0.283083	0.85	0.713	6.04565e-295
RSL1D1	1.20197e-279	-0.283975	0.808	0.869	2.40393e-276
HIST1H4C	0	-0.288057	0.797	0.891	0
SNX9	0	-0.288945	0.895	0.839	0
CD7	1.15124e-295	-0.289022	0.831	0.915	2.30248e-292
DDX21	0	-0.289241	0.735	0.88	0
TSPYL2	0	-0.28987	0.8	0.856	0
NFKBIZ	0	-0.296547	0.954	0.909	0
BACH2	0	-0.297944	0.871	0.835	0
BTG2	0	-0.299142	0.915	0.923	0
NCF1	0	-0.300342	0.638	0.711	0
RPL37	0	-0.302257	1	0.996	0
TTC39C	0	-0.303448	0.81	0.886	0
AIF1	4.1458e-92	-0.303581	0.737	0.696	8.29161e-89
NPM1	0	-0.304288	0.994	0.991	0
RPL12	0	-0.304491	1	0.996	0
FAM177A1	0	-0.308358	0.899	0.95	0
CCR7	1.65138e-76	-0.309844	0.629	0.56	3.30276e-73
SESN3	0	-0.312932	0.405	0.768	0
PDCD4	0	-0.318086	0.846	0.898	0
RPS28	0	-0.318883	1	0.996	0
PLP2	2.54077e-266	-0.321742	0.959	0.946	5.08154e-263
C6orf48	0	-0.325685	0.742	0.811	0
H3F3B	0	-0.326938	1	1	0
EEF1A1	0	-0.329714	1	1	0
RPS3A	0	-0.33013	1	1	0
RPL18A	0	-0.334402	1	1	0
HSP90AB1	0	-0.33535	0.964	0.984	0
SPINT2	0	-0.336999	0.885	0.745	0
EEF2	0	-0.338559	0.996	0.998	0
G3BP2	0	-0.338573	0.863	0.934	0
DDIT4	9.58845e-47	-0.339065	0.787	0.772	1.91769e-43
SELL	5.10255e-175	-0.339075	0.633	0.651	1.02051e-171
PDE4D	0	-0.339902	0.888	0.925	0
EIF3E	0	-0.342324	0.9	0.943	0
TPT1	0	-0.346669	1	0.999	0
RPL10A	0	-0.346916	1	0.999	0
RPS2	0	-0.359066	0.999	0.998	0
PIK3R1	0	-0.361477	0.964	0.971	0
RPL4	0	-0.362141	0.998	0.999	0
RPS25	0	-0.363311	1	0.999	0
EEF1G	0	-0.366358	0.995	0.998	0
LINC02446	1.04417e-279	-0.366744	0.604	0.703	2.08834e-276
EML4	0	-0.369155	0.966	0.979	0
ARMH1	2.76688e-161	-0.371962	0.646	0.633	5.53376e-158
BEX2	0	-0.372376	0.836	0.862	0
USP36	0	-0.373007	0.79	0.936	0
LDHB	0	-0.376162	0.925	0.945	0
PER1	0	-0.380049	0.944	0.946	0
RPL9	0	-0.385601	0.999	1	0
RPL36	0	-0.387537	1	0.995	0
PDE3B	0	-0.392565	0.678	0.842	0
RPS13	0	-0.393059	1	0.997	0
BTG1	0	-0.39641	0.985	0.993	0
TRBV20-1	2.45546e-285	-0.397064	0.355	0.531	4.91091e-282
RPL32	0	-0.398787	1	1	0
RPS12	0	-0.406166	1	1	0
RPS5	0	-0.406267	1	0.999	0
RPS8	0	-0.406955	1	0.999	0
PIK3IP1	0	-0.412027	0.754	0.817	0
SLC2A3	0	-0.412735	0.708	0.888	0
RPS18	0	-0.41535	1	1	0
RPS6	0	-0.416565	1	1	0
ZNF331	0	-0.421577	0.825	0.91	0
FOXP1	0	-0.42612	0.833	0.89	0
LEF1	9.5562e-216	-0.429364	0.656	0.654	1.91124e-212
SH3YL1	0	-0.430252	0.737	0.852	0
FTH1	0	-0.4329	1	1	0
SATB1	0	-0.433506	0.856	0.859	0
ARHGAP15	0	-0.441872	0.715	0.863	0
ZFP36	0	-0.443117	0.892	0.967	0
CD55	0	-0.45164	0.709	0.844	0
RPLP0	0	-0.45621	1	0.999	0
CD69	0	-0.45807	0.964	0.983	0
RPLP1	0	-0.463249	1	1	0
TNFAIP3	0	-0.475415	0.877	0.957	0
SNHG8	0	-0.4761	0.821	0.93	0
RPL13	0	-0.49319	1	1	0
CXCR4	0	-0.503087	0.834	0.915	0
TMEM123	0	-0.518534	0.81	0.875	0
EEF1B2	0	-0.520461	0.997	0.997	0
CAMK4	0	-0.523509	0.738	0.873	0
PASK	0	-0.527653	0.852	0.834	0
NR4A2	0	-0.528192	0.758	0.925	0
NOSIP	0	-0.533226	0.788	0.825	0
JUN	0	-0.539912	0.903	0.953	0
GZMK	5.11253e-19	-0.540355	0.925	0.859	1.02251e-15
SARAF	0	-0.569889	0.982	0.996	0
CSRNP1	0	-0.574329	0.926	0.957	0
AQP3	0	-0.603037	0.722	0.753	0
MAL	0	-0.6104	0.735	0.773	0
FLT3LG	0	-0.618022	0.677	0.879	0
TCF7	0	-0.635544	0.546	0.739	0
RCAN3	0	-0.637633	0.957	0.881	0
PABPC1	0	-0.664163	0.992	0.999	0
JUNB	0	-0.676211	0.942	0.975	0
LEPROTL1	0	-0.707685	0.869	0.96	0
FOS	0	-0.715991	0.643	0.762	0
DUSP1	0	-0.72711	0.798	0.937	0
ZFP36L2	0	-0.73474	0.964	0.991	0
DUSP2	0	-0.757238	0.862	0.94	0
NELL2	0	-0.785008	0.96	0.896	0
IL7R	0	-1.10344	0.895	0.948	0
LTB	0	-1.69777	0.867	0.964	0

## Sheet: (4) CD45RO+ memory
	p_val	avg_logFC	pct.1	pct.2	p_val_adj
KLRB1	0	1.57718	0.999	0.945	0
DDIT4	0	1.45013	0.979	0.752	0
AQP3	0	1.44284	0.935	0.728	0
NCR3	0	1.20248	0.925	0.686	0
DUSP2	0	1.13812	0.999	0.921	0
TRBV6-4	0	1.04549	0.734	0.718	0
BHLHE40	0	1.00774	0.94	0.827	0
CSRNP1	0	0.99086	0.972	0.95	0
SPOCK2	0	0.926999	0.996	0.955	0
FOS	0	0.875184	0.88	0.729	0
ZFP36L1	0	0.871844	0.971	0.941	0
H3F3B	0	0.864948	1	1	0
LTB	0	0.847039	0.994	0.945	0
SLC7A5	0	0.810955	0.938	0.928	0
ZBTB16	0	0.807042	0.871	0.808	0
NR4A2	0	0.801636	0.952	0.895	0
CCR6	0	0.794669	0.768	0.809	0
SRSF7	0	0.790241	0.994	0.937	0
ZFP36L2	0	0.7818	0.999	0.986	0
LDHA	0	0.781101	0.992	0.951	0
HIST1H1C	0	0.746475	0.907	0.924	0
TNFAIP3	0	0.746086	0.978	0.942	0
DUSP1	0	0.739285	0.978	0.909	0
HIST1H4C	0	0.720515	0.928	0.871	0
ZFP36	0	0.693771	0.989	0.952	0
LST1	0	0.687093	0.79	0.697	0
PRNP	0	0.66731	0.925	0.865	0
SLC2A3	0	0.666315	0.939	0.852	0
HSPA5	0	0.666296	0.972	0.918	0
TTC39C	0	0.644502	0.947	0.866	0
PDE4D	0	0.6314	0.915	0.92	0
ID2	0	0.627591	0.887	0.799	0
FTH1	0	0.62424	1	1	0
BTG1	0	0.621641	0.999	0.991	0
HIST2H2AA4	0	0.62063	0.829	0.83	0
TRAV1-2	0	0.614	0.754	0.601	0
GZMK	0	0.613018	0.972	0.858	0
SLC4A10	0	0.608713	0.64	0.752	0
ARL4C	0	0.601381	0.918	0.787	0
PTP4A1	0	0.601148	0.946	0.937	0
FOSL2	0	0.594221	0.9	0.88	0
RORA	0	0.594099	0.899	0.828	0
H1FX	0	0.585012	0.858	0.722	0
TNF	0	0.579847	0.74	0.906	0
GPR65	0	0.570494	0.824	0.747	0
CTSA	0	0.566923	0.845	0.675	0
TPM4	0	0.558917	0.886	0.694	0
HIST1H1D	0	0.556859	0.889	0.906	0
MT2A	0	0.556851	0.853	0.825	0
TOB1	0	0.55056	0.813	0.807	0
CEBPD	0	0.548776	0.691	0.608	0
XBP1	0	0.547912	0.894	0.773	0
S100A4	0	0.538801	0.999	0.976	0
ERN1	0	0.536658	0.712	0.636	0
GTF3C1	0	0.534472	0.811	0.662	0
TRBV6-1	7.76042e-158	0.531016	0.552	0.522	1.55208e-154
PER1	0	0.53031	0.937	0.947	0
SRGN	0	0.523204	0.979	0.935	0
BRD2	0	0.510713	0.905	0.733	0
TRBV4-2	0	0.501473	0.776	0.499	0
ALOX5AP	0	0.494522	0.805	0.723	0
DNAJA1	0	0.492752	0.922	0.864	0
EIF4A1	0	0.490587	0.913	0.882	0
S100A6	0	0.490347	0.998	0.986	0
EML4	0	0.490034	0.979	0.977	0
MAZ	0	0.477131	0.885	0.722	0
ADRB2	0	0.475698	0.76	0.618	0
ATF7IP2	0	0.47351	0.889	0.799	0
BLK	0	0.473502	0.661	0.633	0
VSIR	0	0.473329	0.87	0.678	0
ZNF331	0	0.46319	0.919	0.894	0
AL118516.1	0	0.458034	0.881	0.75	0
LGALS3	0	0.454961	0.751	0.852	0
LITAF	0	0.454594	0.989	0.95	0
GADD45B	0	0.449723	0.91	0.841	0
TGFB1	0	0.449583	0.962	0.883	0
GLRX	0	0.446072	0.68	0.477	0
MAF	0	0.436903	0.739	0.814	0
CDKN1A	0	0.435645	0.777	0.83	0
SCART1	3.91768e-271	0.434969	0.605	0.658	7.83536e-268
TRBV20-1	1.6918e-17	0.434297	0.479	0.507	3.3836e-14
SLC25A5	0	0.426335	0.965	0.876	0
TUBB4B	0	0.424418	0.819	0.755	0
SERTAD1	0	0.416488	0.84	0.63	0
CXCR4	0	0.411098	0.933	0.899	0
PDE4B	0	0.409524	0.813	0.608	0
CNN2	0	0.408531	0.985	0.933	0
NFKBIA	0	0.403679	0.983	0.99	0
TLE1	0	0.403355	0.827	0.797	0
HSP90AB1	0	0.398737	0.991	0.979	0
FKBP11	0	0.390986	0.844	0.768	0
MAFF	0	0.384755	0.797	0.816	0
VPS37B	0	0.384708	0.891	0.882	0
LTK	1.81433e-238	0.38444	0.605	0.705	3.62867e-235
ARHGEF7	0	0.38372	0.86	0.762	0
TENT5C	7.68113e-297	0.381513	0.792	0.816	1.53623e-293
TSPAN15	0	0.380723	0.675	0.778	0
HIST1H1E	1.91865e-175	0.369852	0.916	0.958	3.83731e-172
SPTY2D1	0	0.369306	0.857	0.787	0
RGS2	0	0.368239	0.768	0.767	0
JUNB	0	0.363588	0.992	0.968	0
YPEL5	0	0.36342	0.956	0.952	0
CD69	0	0.361462	0.974	0.981	0
TYROBP	0	0.361237	0.669	0.578	0
IGFBP4	0	0.360299	0.826	0.875	0
FURIN	0	0.358086	0.837	0.826	0
NR1D1	0	0.357565	0.644	0.505	0
LUZP1	0	0.347262	0.828	0.805	0
IER2	0	0.342551	0.942	0.935	0
PLXND1	0	0.34176	0.696	0.788	0
SOCS3	3.75677e-269	0.334155	0.612	0.535	7.51355e-266
PHACTR2	8.96428e-259	0.332104	0.69	0.678	1.79286e-255
ABHD15	0	0.330337	0.779	0.679	0
TRBV6-2	1.30706e-21	0.324403	0.536	0.617	2.61412e-18
SATB1	1.77753e-258	0.323866	0.868	0.858	3.55506e-255
TSPYL2	0	0.320937	0.871	0.845	0
GYG1	3.9212e-166	0.320767	0.788	0.858	7.84241e-163
PRR7	0	0.317722	0.736	0.663	0
CERK	0	0.314929	0.711	0.462	0
COL6A2	0	0.311603	0.773	0.519	0
IFRD1	0	0.311493	0.803	0.781	0
IL7R	0	0.310094	0.98	0.936	0
GZMA	0	0.308359	0.892	0.76	0
SH2D2A	2.91349e-234	0.307507	0.897	0.923	5.82698e-231
ME1	0	0.302975	0.668	0.866	0
MYLIP	0	0.302918	0.839	0.806	0
MYC	2.16911e-94	0.30087	0.636	0.693	4.33822e-91
PRDM1	1.77569e-142	0.297933	0.754	0.831	3.55139e-139
NINJ1	7.82605e-301	0.297924	0.876	0.853	1.56521e-297
PDCD4	4.70272e-267	0.293539	0.93	0.885	9.40545e-264
SYAP1	0	0.292134	0.873	0.817	0
ZC3H12A	4.64285e-271	0.289269	0.822	0.925	9.28571e-268
ATG2A	0	0.288751	0.869	0.918	0
ROR2	0	0.285371	0.845	0.924	0
OSM	0	0.285367	0.599	0.432	0
PNP	0	0.284585	0.735	0.565	0
HERPUD1	1.56299e-233	0.284394	0.878	0.843	3.12597e-230
ETV3	0	0.283631	0.818	0.797	0
NR4A3	0	0.282694	0.775	0.806	0
IFNGR1	2.72781e-83	0.280408	0.779	0.871	5.45563e-80
PABPC1	0	0.280244	1	0.998	0
IVNS1ABP	0	0.278191	0.736	0.588	0
B4GALT1	4.38839e-210	0.278068	0.812	0.805	8.77679e-207
TMIGD2	1.23128e-08	0.277481	0.494	0.629	2.46255e-05
DNAJC1	0	0.273586	0.768	0.648	0
PLEKHF1	0	0.272538	0.796	0.542	0
KLRG1	4.8441e-157	0.27205	0.701	0.708	9.68819e-154
MIDN	0	0.271755	0.781	0.738	0
AC004832.6	0	0.271429	0.803	0.801	0
FAM177A1	2.53007e-280	0.268039	0.931	0.943	5.06014e-277
TUBA1B	2.49862e-211	0.267197	0.924	0.906	4.99724e-208
SYTL2	3.25592e-28	0.266821	0.56	0.666	6.51183e-25
LINC01644	1.48474e-28	0.264556	0.492	0.598	2.96948e-25
GALC	3.94732e-110	0.263844	0.633	0.706	7.89463e-107
G3BP2	4.11358e-190	0.263423	0.928	0.923	8.22717e-187
MIR22HG	0	0.255398	0.829	0.855	0
IL18RAP	0.0222958	0.252511	0.487	0.748	1
PRF1	5.08268e-232	0.252253	0.661	0.5	1.01654e-228
KLRC3	0	-0.253668	0.558	0.907	0
PTPN6	2.57598e-71	-0.253807	0.374	0.551	5.15195e-68
ATM	1.04633e-131	-0.25561	0.529	0.71	2.09267e-128
NDFIP1	3.03374e-128	-0.257693	0.692	0.834	6.06749e-125
PFN1	1.57347e-126	-0.257825	0.997	0.991	3.14694e-123
RIPOR2	1.08163e-113	-0.259893	0.549	0.713	2.16327e-110
DOCK10	0	-0.260123	0.437	0.731	0
ITPKB	0	-0.260156	0.483	0.795	0
TRBV29-1	3.07474e-116	-0.260654	0.223	0.547	6.14949e-113
TRBV4-1	1.64041e-05	-0.260964	0.393	0.506	0.0328081
ANKRD12	3.21734e-147	-0.261197	0.752	0.89	6.43467e-144
TRAV14DV4	2.77484e-07	-0.262256	0.342	0.481	0.000554967
SERINC5	7.32285e-228	-0.263665	0.465	0.636	1.46457e-224
TRBV12-3	0	-0.265205	0.31	0.752	0
TUBA1A	2.32403e-134	-0.266199	0.621	0.776	4.64806e-131
PRKCB	4.00635e-87	-0.266775	0.481	0.618	8.01269e-84
CCR7	1.96988e-84	-0.269647	0.427	0.586	3.93976e-81
SAMHD1	2.33463e-83	-0.271107	0.321	0.542	4.66926e-80
LINC00861	7.24031e-62	-0.271198	0.414	0.597	1.44806e-58
LYST	0	-0.271392	0.511	0.852	0
ANXA1	1.16056e-72	-0.273715	0.721	0.827	2.32112e-69
FXYD2	0	-0.274455	0.504	0.901	0
MHENCR	0	-0.274663	0.451	0.764	0
HLA-DQB1	2.71869e-142	-0.277337	0.727	0.822	5.43738e-139
FCRL6	3.44721e-25	-0.281717	0.569	0.44	6.89441e-22
CCL4	1.09454e-116	-0.283467	0.504	0.755	2.18908e-113
SESN3	0	-0.287203	0.481	0.738	0
RHOB	0	-0.289942	0.432	0.821	0
CD27	1.02777e-203	-0.29103	0.621	0.777	2.05554e-200
KLRD1	1.17243e-284	-0.29845	0.332	0.682	2.34487e-281
TRBV19	8.86532e-24	-0.301007	0.477	0.456	1.77306e-20
SAMSN1	0	-0.302818	0.532	0.879	0
TRBV27	5.90949e-37	-0.303373	0.319	0.397	1.1819e-33
TRBV12-4	0	-0.305855	0.201	0.653	0
ADGRG1	5.71495e-41	-0.305945	0.616	0.481	1.14299e-37
TMSB4X	0	-0.30989	0.999	0.996	0
GPR174	0	-0.312716	0.423	0.752	0
ITGB2-AS1	0	-0.314078	0.359	0.673	0
TRAV20	0	-0.315672	0.074	0.581	0
CMC1	2.2211e-64	-0.316149	0.533	0.691	4.4422e-61
HLA-DRA	1.29558e-241	-0.318524	0.723	0.762	2.59116e-238
RGS10	5.89154e-219	-0.325938	0.732	0.856	1.17831e-215
TXNIP	0	-0.335847	0.927	0.956	0
TMSB10	0	-0.338506	1	0.996	0
PIK3R1	2.73393e-179	-0.344548	0.87	0.98	5.46786e-176
CLDND1	0	-0.34596	0.701	0.95	0
CD2	2.82657e-269	-0.346308	0.512	0.77	5.65313e-266
TRBV2	0	-0.347822	0.672	0.679	0
KLF2	0	-0.349579	0.603	0.824	0
RIC3	0	-0.354168	0.701	0.807	0
MYO1G	0	-0.354908	0.551	0.828	0
MALAT1	0	-0.358227	1	0.998	0
CD74	8.47278e-07	-0.359834	0.966	0.965	0.00169456
YBX3	0	-0.362294	0.334	0.667	0
TRBV7-6	0	-0.363933	0.31	0.666	0
ARMH1	7.39481e-254	-0.365928	0.45	0.655	1.47896e-250
S100A10	4.38014e-272	-0.366679	0.939	0.972	8.76028e-269
GCC2	0	-0.367879	0.607	0.891	0
CYTOR	0	-0.371141	0.454	0.759	0
AIF1	0	-0.379903	0.701	0.702	0
HSPB1	3.07182e-294	-0.394125	0.476	0.713	6.14364e-291
ANXA6	4.86611e-282	-0.407845	0.59	0.794	9.73221e-279
TRBV7-2	5.92217e-236	-0.41181	0.381	0.599	1.18443e-232
LDHB	0	-0.414574	0.908	0.945	0
RHOH	0	-0.422974	0.695	0.917	0
HMGB2	0	-0.442107	0.72	0.935	0
ZEB2	0	-0.450494	0.223	0.814	0
TRBV28	3.3444e-194	-0.450684	0.286	0.575	6.6888e-191
ZNF683	0	-0.464368	0.35	0.726	0
ITGB1	0	-0.465036	0.492	0.734	0
ARID5B	0	-0.509208	0.291	0.858	0
GSTP1	0	-0.512743	0.54	0.794	0
TRBV9	0	-0.516335	0.361	0.806	0
PASK	0	-0.534012	0.405	0.884	0
TSC22D3	0	-0.545342	0.862	0.945	0
FOXP1	0	-0.564183	0.665	0.905	0
TRBC2	0	-0.572165	0.727	0.924	0
LEF1	0	-0.572719	0.363	0.685	0
MAL	0	-0.579635	0.497	0.796	0
CCL5	4.79193e-221	-0.592314	0.992	0.961	9.58387e-218
NELL2	0	-0.613487	0.65	0.933	0
ITGA4	0	-0.620612	0.426	0.809	0
TRBV5-1	2.63966e-54	-0.635901	0.687	0.628	5.27932e-51
CD8A	0	-0.655242	0.811	0.955	0
SELL	0	-0.658108	0.279	0.688	0
TRBV7-9	2.75967e-190	-0.66542	0.157	0.563	5.51933e-187
HLA-DPB1	0	-0.709609	0.52	0.728	0
HLA-DPA1	0	-0.731811	0.49	0.788	0
KLF6	0	-0.779249	0.737	0.972	0
HLA-DRB1	0	-0.788416	0.265	0.662	0
FYB1	0	-0.817057	0.54	0.892	0
GZMB	2.1914e-70	-0.821434	0.676	0.735	4.38279e-67
LGALS1	0	-0.823816	0.637	0.935	0
FGFBP2	3.47126e-72	-0.90369	0.209	0.545	6.94252e-69
LINC02446	0	-0.905174	0.396	0.72	0
COTL1	0	-1.09392	0.681	0.944	0
GNLY	0.00025492	-1.20066	0.735	0.908	0.509839
GZMH	8.32264e-299	-1.27609	0.616	0.754	1.66453e-295
CD8B	0	-1.62182	0.35	0.951	0

## Sheet: (5) transitional
	p_val	avg_logFC	pct.1	pct.2	p_val_adj
DUSP2	1.27521e-263	0.330133	0.965	0.925	2.55042e-260
GZMK	0	0.320056	0.955	0.862	0
LYAR	1.49987e-162	0.299135	0.954	0.924	2.99974e-159
CCL5	1.27821e-232	0.2636	0.998	0.961	2.55643e-229
CST7	1.50901e-231	0.250851	0.98	0.968	3.01801e-228
LEF1	2.72716e-180	-0.269253	0.518	0.666	5.45431e-177
LINC02446	1.04566e-30	-0.308307	0.711	0.686	2.09132e-27
NELL2	3.08258e-15	-0.317971	0.943	0.902	6.16517e-12
PASK	2.16844e-53	-0.324026	0.892	0.832	4.33689e-50
NOSIP	5.3299e-122	-0.333256	0.8	0.821	1.06598e-118
LTB	8.83163e-97	-0.369072	0.979	0.947	1.76633e-93
MAL	0.35383	-0.461598	0.872	0.758	1

## Sheet: (6) GATA3+ CD8
	p_val	avg_logFC	pct.1	pct.2	p_val_adj
GATA3	0	0.870206	0.973	0.878	0
LTB	0	0.707183	0.995	0.947	0
PLP2	0	0.59464	0.977	0.946	0
ITGB1	0	0.534393	0.887	0.702	0
TOB1	0	0.527239	0.926	0.801	0
VIM	0	0.519463	1	0.996	0
CRIP2	0	0.493025	0.787	0.784	0
TNFRSF4	0	0.482927	0.899	0.834	0
CAPG	0	0.479281	0.812	0.747	0
CRIP1	0	0.473022	0.974	0.907	0
LGALS1	2.98984e-303	0.463827	0.945	0.904	5.97968e-300
NOSIP	0	0.463398	0.953	0.813	0
TAGLN2	0	0.449867	0.974	0.9	0
ARID5B	0	0.445996	0.935	0.797	0
FXYD7	0	0.435496	0.908	0.848	0
TIMP1	1.32599e-271	0.420053	0.861	0.75	2.65199e-268
S100A10	1.84922e-302	0.413132	0.993	0.967	3.69844e-299
SLC2A3	1.39802e-244	0.394207	0.945	0.856	2.79605e-241
ARHGAP15	1.89386e-277	0.370207	0.941	0.836	3.78773e-274
PI16	9.40364e-226	0.361588	0.686	0.747	1.88073e-222
JUNB	4.64475e-168	0.35757	0.988	0.969	9.2895e-165
MAL	3.53778e-184	0.348746	0.796	0.766	7.07556e-181
LMNA	0	0.336548	0.844	0.84	0
ZFP36L2	7.09672e-222	0.321013	0.995	0.986	1.41934e-218
PLSCR3	8.7881e-208	0.314204	0.87	0.684	1.75762e-204
S100A4	8.50768e-183	0.314124	0.997	0.977	1.70154e-179
ANXA2	3.53255e-165	0.312106	0.841	0.766	7.06511e-162
LDHB	2.34167e-230	0.31095	0.988	0.939	4.68335e-227
EMP3	7.11353e-228	0.309225	0.971	0.904	1.42271e-224
TMEM123	1.66015e-174	0.296549	0.938	0.862	3.32029e-171
SELL	1.23563e-141	0.295443	0.846	0.638	2.47126e-138
AHNAK	3.15646e-138	0.293454	0.952	0.898	6.31293e-135
FLT3LG	3.43242e-171	0.289662	0.955	0.844	6.86483e-168
RCAN3	5.25832e-174	0.286485	0.898	0.892	1.05166e-170
CD52	1.88476e-267	0.283568	0.998	0.985	3.76953e-264
SAMSN1	4.58551e-296	0.283049	0.907	0.843	9.17102e-293
IL7R	6.06798e-161	0.274367	0.973	0.939	1.2136e-157
NR3C1	6.26589e-204	0.274282	0.937	0.866	1.25318e-200
NPDC1	2.02142e-77	0.268471	0.664	0.605	4.04284e-74
CYLD	8.12595e-159	0.268096	0.864	0.745	1.62519e-155
RGCC	5.27656e-103	0.258958	0.728	0.68	1.05531e-99
CD82	5.06127e-45	0.258487	0.625	0.662	1.01225e-41
DSTN	4.12116e-130	0.251973	0.862	0.751	8.24232e-127
CLIC3	1.94048e-11	-0.251022	0.461	0.53	3.88097e-08
SAMD3	1.77387e-13	-0.251805	0.532	0.574	3.54775e-10
SYTL3	1.27819e-31	-0.25196	0.911	0.932	2.55638e-28
FCRL6	3.01574e-08	-0.256765	0.345	0.458	6.03147e-05
ITGA4	5.23788e-40	-0.261624	0.791	0.771	1.04758e-36
SH2D2A	9.08482e-39	-0.262762	0.907	0.921	1.81696e-35
TBX21	8.91463e-68	-0.262843	0.478	0.644	1.78293e-64
MRPL10	3.93184e-34	-0.264306	0.802	0.803	7.86369e-31
CLEC2B	6.02792e-61	-0.266538	0.901	0.928	1.20558e-57
CBLB	2.55894e-90	-0.267644	0.746	0.824	5.11788e-87
CD6	1.89544e-80	-0.270873	0.764	0.884	3.79088e-77
ITGB2	8.14849e-20	-0.272108	0.898	0.865	1.6297e-16
HLA-DRB1	0.814623	-0.274406	0.665	0.621	1
LYST	1.01441e-112	-0.279653	0.754	0.822	2.02882e-109
H1FX	3.20684e-13	-0.281226	0.725	0.736	6.41369e-10
NUCB2	2.18008e-66	-0.285896	0.637	0.73	4.36015e-63
ARPC5L	4.9791e-36	-0.291499	0.788	0.809	9.95819e-33
PMAIP1	7.89941e-128	-0.293281	0.892	0.938	1.57988e-124
S1PR5	9.08971e-119	-0.294301	0.474	0.682	1.81794e-115
SPON2	0.109461	-0.302178	0.541	0.501	1
ADGRG1	3.19472e-30	-0.307931	0.402	0.499	6.38944e-27
TYROBP	1.33928e-12	-0.317099	0.663	0.583	2.67857e-09
TRBV5-1	9.90357e-105	-0.320196	0.479	0.641	1.98071e-101
PRF1	1.24042e-33	-0.326626	0.433	0.52	2.48084e-30
EFHD2	1.24282e-20	-0.330083	0.57	0.587	2.48565e-17
C12orf75	3.39103e-46	-0.336382	0.7	0.766	6.78207e-43
AOAH	1.52851e-151	-0.343286	0.806	0.774	3.05703e-148
PDCD4	7.6289e-86	-0.345231	0.809	0.894	1.52578e-82
KLRG1	2.82979e-98	-0.346518	0.566	0.715	5.65957e-95
LITAF	2.56234e-118	-0.347787	0.945	0.954	5.12469e-115
MAP3K8	9.6221e-34	-0.361916	0.762	0.782	1.92442e-30
CD8A	2.29167e-108	-0.382565	0.922	0.942	4.58334e-105
KLRD1	4.11811e-27	-0.39165	0.609	0.65	8.23623e-24
SYNE1	1.60834e-85	-0.40124	0.461	0.614	3.21668e-82
APMAP	4.04775e-58	-0.401688	0.628	0.68	8.09549e-55
HLA-DPA1	3.07203e-71	-0.439653	0.659	0.764	6.14405e-68
CD74	6.61264e-64	-0.447755	0.955	0.965	1.32253e-60
ZEB2	7.87823e-115	-0.450482	0.746	0.757	1.57565e-111
MATK	3.49276e-119	-0.523753	0.58	0.7	6.98552e-116
FYN	4.05749e-203	-0.526054	0.747	0.887	8.11499e-200
LYAR	2.0767e-278	-0.574114	0.763	0.934	4.1534e-275
CTSW	0	-0.614895	0.951	0.981	0
CCL4	7.33266e-134	-0.642851	0.695	0.732	1.46653e-130
GZMM	0	-0.698532	0.811	0.906	0
CMC1	1.65537e-155	-0.70228	0.524	0.683	3.31073e-152
DUSP2	6.0906e-83	-0.739204	0.914	0.929	1.21812e-79
GZMA	3.06859e-288	-0.751845	0.539	0.784	6.13719e-285
GZMB	2.05073e-35	-0.829554	0.82	0.725	4.10146e-32
FGFBP2	4.52054e-59	-0.882604	0.338	0.521	9.04108e-56
GZMK	0	-0.939092	0.618	0.881	0
CST7	8.63939e-297	-1.20958	0.907	0.972	1.72788e-293
KLRB1	0	-1.29158	0.816	0.956	0
GZMH	1.31238e-189	-1.29204	0.661	0.744	2.62476e-186
CCL5	0	-1.60373	0.695	0.977	0
GNLY	2.59014e-108	-2.07764	0.846	0.894	5.18028e-105
NKG7	0	-2.16275	0.691	0.897	0

## Sheet: (7) NK-like effectors
	p_val	avg_logFC	pct.1	pct.2	p_val_adj
GNLY	0	2.04184	0.997	0.888	0
TYROBP	0	1.55096	0.942	0.575	0
GZMB	0	1.49163	0.958	0.722	0
NKG7	0	1.30432	0.999	0.884	0
FGFBP2	0	1.17241	0.876	0.501	0
FCER1G	0	1.05435	0.938	0.455	0
LGALS1	0	0.944972	0.938	0.905	0
IFITM2	0	0.928119	0.995	0.923	0
KLRD1	0	0.865424	0.879	0.641	0
CTSW	0	0.863043	0.997	0.979	0
SPON2	0	0.859	0.805	0.493	0
KLRF1	0	0.850047	0.838	0.555	0
CLIC3	6.83581e-258	0.833957	0.786	0.519	1.36716e-254
CCL5	0	0.819818	0.987	0.964	0
CST7	0	0.817478	0.997	0.968	0
KLRC1	0	0.797213	0.875	0.814	0
IL2RB	0	0.794821	0.866	0.594	0
RHOC	0	0.773456	0.839	0.748	0
ITGB2	0	0.772171	0.985	0.863	0
MATK	0	0.751474	0.91	0.688	0
FCGR3A	1.66141e-251	0.743411	0.754	0.373	3.32283e-248
KLRB1	0	0.737059	0.995	0.948	0
HOPX	0	0.727198	0.921	0.841	0
HSH2D	0	0.724527	0.865	0.742	0
IFITM3	1.58643e-250	0.689344	0.81	0.768	3.17285e-247
APMAP	2.69166e-262	0.679403	0.865	0.671	5.38332e-259
EFHD2	0	0.676306	0.88	0.576	0
GZMA	0	0.660675	0.957	0.767	0
MAP3K8	2.40839e-235	0.64731	0.84	0.779	4.81678e-232
CD247	3.36561e-300	0.616865	0.93	0.766	6.73122e-297
IFITM1	0	0.59927	0.998	0.986	0
XCL2	1.05232e-224	0.595176	0.772	0.661	2.10465e-221
PFN1	0	0.590582	0.999	0.991	0
PRF1	3.50502e-307	0.581659	0.859	0.505	7.01004e-304
KIR3DL2	0	0.573958	0.826	0.673	0
CCL4	5.17095e-149	0.570495	0.792	0.728	1.03419e-145
GSTP1	2.52931e-242	0.569139	0.897	0.765	5.05861e-239
TTC38	9.521e-115	0.564398	0.674	0.442	1.9042e-111
YWHAQ	6.89815e-213	0.561674	0.952	0.794	1.37963e-209
GZMH	6.90118e-266	0.558251	0.906	0.735	1.38024e-262
AOAH	3.0946e-165	0.522811	0.816	0.775	6.1892e-162
PPP1R18	2.2567e-171	0.522736	0.805	0.582	4.51339e-168
DOK2	2.49164e-152	0.517949	0.848	0.797	4.98327e-149
ITGAM	3.91345e-144	0.515392	0.705	0.579	7.8269e-141
ACTB	4.29555e-281	0.515213	1	0.996	8.5911e-278
CCL3	0	0.50007	0.842	0.734	0
PRSS23	5.62332e-80	0.497839	0.65	0.434	1.12466e-76
CD63	1.13326e-103	0.489358	0.754	0.672	2.26653e-100
AC004687.1	4.4818e-171	0.478016	0.824	0.612	8.96361e-168
LYN	3.48483e-54	0.477907	0.621	0.681	6.96965e-51
C12orf75	4.67499e-176	0.477126	0.895	0.759	9.34998e-173
XCL1	5.75573e-288	0.475981	0.768	0.434	1.15115e-284
ACTN4	7.14344e-183	0.464725	0.87	0.738	1.42869e-179
ZBP1	1.02422e-188	0.459216	0.912	0.836	2.04844e-185
FLNA	8.75373e-167	0.452948	0.976	0.933	1.75075e-163
UCP2	2.49468e-138	0.448189	0.842	0.671	4.98936e-135
TRBC1	1.78478e-89	0.444485	0.818	0.738	3.56955e-86
KLRC3	0.00318216	0.443291	0.616	0.881	1
ADGRG1	1.7824e-96	0.441675	0.694	0.488	3.5648e-93
TNFRSF18	1.72756e-178	0.43419	0.729	0.821	3.45512e-175
SH3BGRL3	0	0.433114	0.999	0.989	0
ABHD17A	2.8313e-102	0.431181	0.729	0.539	5.6626e-99
PLEK	2.42503e-121	0.427923	0.723	0.599	4.85007e-118
ZNF683	0	0.422407	0.94	0.681	0
TSPAN32	5.38789e-138	0.41543	0.746	0.467	1.07758e-134
GZMM	1.21082e-157	0.414035	0.948	0.9	2.42164e-154
APOBEC3G	1.63376e-94	0.406219	0.734	0.583	3.26752e-91
LY6E	9.05755e-149	0.405606	0.959	0.929	1.81151e-145
HLA-DPA1	8.09128e-177	0.405333	0.947	0.753	1.61826e-173
PLEKHF1	1.07334e-131	0.405001	0.721	0.561	2.14668e-128
AKR1C3	4.37965e-114	0.404429	0.675	0.595	8.75929e-111
CRIP1	9.15782e-127	0.404002	0.949	0.909	1.83156e-123
CDKN2D	1.7422e-100	0.401106	0.819	0.699	3.48439e-97
CHST12	3.56423e-57	0.39881	0.64	0.449	7.12846e-54
TPST2	3.11969e-99	0.397009	0.739	0.526	6.23938e-96
MSN	1.89043e-126	0.396245	0.919	0.862	3.78087e-123
C1orf162	1.43746e-104	0.393946	0.689	0.398	2.87491e-101
TMSB4X	0	0.393401	1	0.997	0
FGR	1.2697e-73	0.390569	0.645	0.428	2.5394e-70
CD160	0	0.388417	0.787	0.426	0
MPST	2.42287e-225	0.388193	0.794	0.632	4.84575e-222
GNG2	5.89439e-99	0.386646	0.847	0.792	1.17888e-95
PYHIN1	4.4024e-88	0.385642	0.715	0.587	8.8048e-85
TMIGD2	2.60068e-252	0.3804	0.837	0.609	5.20135e-249
ADAM8	6.2387e-35	0.378238	0.593	0.457	1.24774e-31
DNAJA1	2.9726e-134	0.376382	0.962	0.867	5.9452e-131
CMC1	3.63145e-107	0.373174	0.803	0.672	7.26291e-104
ADGRE5	1.45787e-81	0.369984	0.835	0.729	2.91574e-78
TCIRG1	4.57637e-85	0.36595	0.79	0.732	9.15274e-82
IL18RAP	1.9947e-216	0.365482	0.757	0.722	3.98939e-213
CHST2	3.39357e-114	0.362393	0.659	0.505	6.78714e-111
CD300A	7.9448e-30	0.360809	0.602	0.528	1.58896e-26
LAT2	2.82551e-13	0.360651	0.542	0.32	5.65101e-10
IER2	3.01391e-97	0.357683	0.961	0.935	6.02781e-94
EPSTI1	0	0.357488	0.846	0.637	0
SPN	6.92312e-68	0.357478	0.682	0.506	1.38462e-64
PYCARD	2.47985e-97	0.356284	0.718	0.495	4.95971e-94
SLC9A3R1	1.93821e-133	0.354223	0.867	0.686	3.87642e-130
SRGN	1.04706e-180	0.353836	0.979	0.938	2.09412e-177
TBX21	8.13903e-51	0.351493	0.667	0.636	1.62781e-47
BHLHE40	8.55352e-207	0.348904	0.934	0.835	1.7107e-203
AC004865.2	4.5829e-228	0.345734	0.807	0.573	9.16581e-225
LINC02384	1.79917e-227	0.344536	0.734	0.429	3.59833e-224
CORO1A	6.79598e-126	0.341729	0.981	0.955	1.3592e-122
CD7	5.44692e-138	0.336126	0.968	0.9	1.08938e-134
AC116366.3	1.21418e-70	0.335247	0.707	0.508	2.42837e-67
FBXO6	1.57077e-85	0.333745	0.638	0.506	3.14154e-82
ANXA4	7.21744e-161	0.332633	0.749	0.599	1.44349e-157
C1orf21	1.58067e-05	0.332578	0.555	0.624	0.0316134
AGTRAP	7.91991e-37	0.328235	0.626	0.489	1.58398e-33
JAZF1	6.46597e-205	0.324903	0.824	0.698	1.29319e-201
TAP1	2.25978e-70	0.324741	0.717	0.535	4.51956e-67
MYBL1	8.03197e-70	0.321586	0.676	0.514	1.60639e-66
OSBPL5	0.780107	0.321489	0.507	0.517	1
RIN3	1.47576e-27	0.31942	0.681	0.688	2.95152e-24
TGFB1	3.33519e-90	0.319064	0.925	0.89	6.67038e-87
GNPTAB	7.6631e-28	0.316936	0.623	0.542	1.53262e-24
MIDN	2.35859e-101	0.315998	0.81	0.74	4.71719e-98
SLA2	4.37855e-73	0.315934	0.792	0.712	8.75709e-70
ARPC5L	6.65304e-76	0.314245	0.866	0.806	1.33061e-72
VPS13C	1.07202e-159	0.314184	0.904	0.706	2.14404e-156
RASSF1	5.91708e-50	0.3133	0.781	0.768	1.18342e-46
SYTL3	4.07347e-62	0.313222	0.918	0.932	8.14694e-59
CXXC5	2.42884e-27	0.311446	0.576	0.52	4.85769e-24
MAPRE2	9.01753e-45	0.310638	0.757	0.686	1.80351e-41
KMT2E-AS1	7.01443e-55	0.310524	0.651	0.479	1.40289e-51
TRBC2	1.39695e-87	0.310133	0.978	0.902	2.79389e-84
SH2D2A	2.68846e-58	0.305791	0.887	0.921	5.37693e-55
LCP1	3.4914e-88	0.305418	0.954	0.913	6.98281e-85
IGF2R	6.10258e-45	0.304576	0.662	0.541	1.22052e-41
AHNAK	5.89509e-75	0.304099	0.936	0.899	1.17902e-71
CEBPD	2.51889e-11	0.303115	0.587	0.617	5.03778e-08
LPCAT1	1.0231e-11	0.302358	0.572	0.54	2.0462e-08
ZBTB16	0	0.301186	0.907	0.811	0
CD244	7.06156e-11	0.299779	0.515	0.331	1.41231e-07
LASP1	2.8136e-34	0.298726	0.603	0.445	5.6272e-31
CD38	1.43791e-22	0.298234	0.585	0.574	2.87583e-19
ESYT1	3.61614e-190	0.297717	0.83	0.481	7.23229e-187
ID2	4.56844e-69	0.297676	0.848	0.807	9.13687e-66
NEAT1	1.47075e-56	0.296365	0.743	0.622	2.94151e-53
PLAC8	2.39411e-50	0.294512	0.78	0.741	4.78822e-47
FOSL2	1.45997e-69	0.293538	0.863	0.882	2.91994e-66
TIGIT	3.04187e-32	0.291546	0.629	0.586	6.08375e-29
NFKBIA	2.40617e-35	0.291462	0.995	0.989	4.81234e-32
ITGB7	2.0972e-50	0.291257	0.695	0.559	4.1944e-47
CDK2AP2	1.50646e-20	0.29003	0.577	0.389	3.01291e-17
CISD3	9.13186e-26	0.289849	0.588	0.477	1.82637e-22
FHL3	6.79908e-59	0.28858	0.692	0.623	1.35982e-55
IL12RB2	0	0.288521	0.863	0.81	0
HVCN1	0	0.287339	0.863	0.408	0
PTGDR	2.38922e-11	0.287259	0.559	0.429	4.77844e-08
XBP1	5.791e-39	0.286486	0.835	0.783	1.1582e-35
CLIC1	2.86155e-110	0.285944	0.931	0.87	5.72309e-107
S1PR5	6.07129e-26	0.283389	0.632	0.674	1.21426e-22
AKNA	2.41963e-46	0.28152	0.834	0.769	4.83926e-43
GAPDH	3.36413e-138	0.281482	0.999	0.999	6.72826e-135
IFI6	2.02338e-120	0.279325	0.854	0.669	4.04676e-117
PLOD1	1.23998e-133	0.277905	0.674	0.43	2.47996e-130
UBE2L6	1.93518e-40	0.27773	0.674	0.552	3.87035e-37
PTPN12	6.68258e-14	0.277651	0.549	0.528	1.33652e-10
ZBTB44	1.12129e-194	0.277322	0.791	0.509	2.24259e-191
THEMIS2	2.75687e-37	0.27675	0.587	0.442	5.51374e-34
TRBV5-1	0	0.276664	0.929	0.625	0
PTPN6	1.57908e-39	0.276608	0.683	0.529	3.15817e-36
FKBP11	3.33052e-70	0.275481	0.899	0.772	6.66105e-67
KLRC2	0.185359	0.275236	0.515	0.586	1
TGFBR3	5.66943e-14	0.273777	0.677	0.759	1.13389e-10
LAIR1	1.03273e-26	0.273151	0.531	0.306	2.06547e-23
CALR	2.00909e-42	0.272135	0.861	0.829	4.01818e-39
GADD45B	1.50597e-41	0.272024	0.911	0.845	3.01195e-38
DIP2A	1.60699e-130	0.271808	0.866	0.7	3.21399e-127
PSME2	1.31667e-68	0.270789	0.86	0.784	2.63334e-65
DSTN	2.87929e-37	0.270405	0.784	0.755	5.75858e-34
ASCL2	0.0166782	0.267266	0.469	0.322	1
NBEAL2	2.93277e-112	0.265914	0.724	0.61	5.86554e-109
PTPN22	3.38539e-69	0.265865	0.778	0.649	6.77078e-66
PREX1	3.11339e-100	0.264393	0.841	0.701	6.22677e-97
NCR3	1.88829e-42	0.264211	0.728	0.709	3.77657e-39
TLN1	5.60071e-24	0.258659	0.687	0.654	1.12014e-20
GBP4	1.48143e-83	0.258176	0.651	0.43	2.96286e-80
MIB2	1.07818e-35	0.257789	0.707	0.614	2.15636e-32
GBP5	6.43547e-52	0.256772	0.763	0.67	1.28709e-48
IQGAP1	1.0249e-28	0.256528	0.745	0.729	2.04979e-25
CTSC	1.76657e-47	0.256092	0.717	0.573	3.53314e-44
DIAPH1	2.01838e-61	0.255456	0.747	0.599	4.03676e-58
S100A4	3.08137e-72	0.255236	0.994	0.978	6.16275e-69
RUNX3	2.54474e-31	0.252955	0.88	0.925	5.08948e-28
IRF1	4.06943e-49	0.25246	0.777	0.621	8.13886e-46
IFNGR1	1.49059e-52	0.252197	0.917	0.861	2.98119e-49
MCTP2	0.00757569	0.252087	0.577	0.681	1
PTGDS	7.09608e-08	0.250503	0.46	0.568	0.000141922
FCMR	2.31635e-69	-0.250484	0.519	0.66	4.63269e-66
TRBV27	3.0874e-09	-0.253171	0.231	0.395	6.1748e-06
UBXN11	1.53226e-253	-0.253281	0.296	0.672	3.06453e-250
TAF1D	9.9646e-88	-0.255598	0.583	0.763	1.99292e-84
HIST1H1D	1.09162e-115	-0.255867	0.736	0.91	2.18324e-112
BEX2	1.19992e-71	-0.256341	0.859	0.858	2.39984e-68
IL6ST	3.63224e-133	-0.257094	0.783	0.835	7.26449e-130
OXNAD1	1.50679e-51	-0.26006	0.687	0.714	3.01357e-48
PIK3IP1	2.43137e-17	-0.260972	0.904	0.804	4.86274e-14
SPINT2	2.23102e-47	-0.261764	0.876	0.763	4.46203e-44
TTC39C	2.21998e-30	-0.262097	0.915	0.873	4.43995e-27
RIC3	2.56541e-69	-0.262998	0.88	0.794	5.13081e-66
SNX9	0	-0.263642	0.564	0.856	0
ST3GAL1	2.01498e-122	-0.268694	0.496	0.726	4.02997e-119
DDX21	3.32183e-97	-0.270372	0.756	0.862	6.64365e-94
SH3YL1	3.86048e-31	-0.270974	0.877	0.833	7.72095e-28
CCR7	5.23123e-28	-0.272269	0.641	0.568	1.04625e-24
RPL37	0	-0.272769	1	0.997	0
TRBV7-2	1.96084e-63	-0.273989	0.388	0.584	3.92169e-60
C6orf48	1.45015e-70	-0.274735	0.725	0.803	2.90031e-67
EEF1G	2.80612e-129	-0.27707	0.998	0.997	5.61224e-126
TUBB2A	0	-0.278505	0.765	0.912	0
SLC2A3	4.06473e-65	-0.279162	0.741	0.864	8.12946e-62
YBX3	1.82799e-79	-0.28039	0.565	0.637	3.65599e-76
INPP4B	1.81122e-46	-0.2804	0.757	0.657	3.62243e-43
LEF1	0.890517	-0.284324	0.787	0.65	1
BCL11B	5.253e-206	-0.284485	0.338	0.642	1.0506e-202
SESN3	1.29681e-232	-0.285194	0.527	0.719	2.59363e-229
TRBV6-5	4.2205e-137	-0.285333	0.112	0.435	8.44099e-134
BTG1	2.15912e-85	-0.287574	0.984	0.992	4.31824e-82
RPSA	4.86959e-249	-0.287627	1	1	9.73919e-246
VIM	4.54752e-109	-0.288259	0.996	0.996	9.09504e-106
RPS19	0	-0.288479	1	1	0
DUSP1	2.3149e-46	-0.297411	0.86	0.917	4.62981e-43
RPS23	0	-0.299146	1	0.997	0
TMEM123	9.19523e-37	-0.299284	0.902	0.864	1.83905e-33
TRBV19	6.04092e-60	-0.300287	0.194	0.467	1.20818e-56
RPL36	2.33974e-288	-0.30382	1	0.996	4.67949e-285
AIF1	0.0564681	-0.305162	0.953	0.694	1
RPL9	2.09561e-257	-0.305828	0.999	1	4.19123e-254
HSP90AB1	2.11209e-78	-0.30931	0.973	0.981	4.22417e-75
RPS4X	0	-0.309485	1	0.997	0
RPS16	0	-0.316978	1	1	0
CD69	3.14096e-72	-0.317345	0.953	0.981	6.28192e-69
RHOH	5.26e-59	-0.318204	0.914	0.895	1.052e-55
RPS28	0	-0.318464	1	0.997	0
RPS3A	0	-0.318468	1	1	0
SNHG8	1.2566e-72	-0.31975	0.951	0.913	2.51321e-69
TPT1	0	-0.325033	1	1	0
RPL12	0	-0.326695	0.999	0.997	0
RPS9	1.39883e-301	-0.328854	0.999	0.999	2.79766e-298
RPL10	0	-0.334365	1	1	0
TRBV7-9	6.8232e-42	-0.335846	0.83	0.514	1.36464e-38
TOB1	4.6533e-24	-0.338033	0.902	0.804	9.30661e-21
JUNB	8.73573e-64	-0.339396	0.965	0.97	1.74715e-60
RPL36A	4.1929e-150	-0.339988	0.982	0.985	8.38579e-147
NR4A2	8.98338e-116	-0.350156	0.731	0.905	1.79668e-112
USP36	0	-0.355093	0.776	0.918	0
TRBV4-2	1.09222e-21	-0.355439	0.386	0.53	2.18444e-18
FTH1	2.08877e-151	-0.367777	1	1	4.17753e-148
CDKN1B	1.96582e-190	-0.369737	0.65	0.871	3.93163e-187
RPL10A	0	-0.370565	1	0.999	0
ARHGAP15	2.37319e-103	-0.372962	0.743	0.844	4.74638e-100
RPS5	0	-0.388068	1	0.999	0
RPLP1	0	-0.390209	1	1	0
TCF7	6.25145e-30	-0.391204	0.858	0.706	1.25029e-26
EML4	1.66019e-130	-0.391886	0.983	0.977	3.32039e-127
PDE3B	3.03139e-280	-0.392721	0.503	0.827	6.06279e-277
PLP2	4.65512e-121	-0.394549	0.951	0.948	9.31024e-118
RPS25	0	-0.398072	1	0.999	0
ARMH1	8.08051e-66	-0.399487	0.734	0.632	1.6161e-62
EEF1A1	0	-0.400608	1	1	0
RPS13	0	-0.404453	1	0.998	0
TSC22D3	1.61837e-112	-0.40476	0.882	0.939	3.23673e-109
EIF3E	2.26167e-130	-0.408577	0.905	0.937	4.52333e-127
EEF2	8.4924e-283	-0.415295	0.994	0.998	1.69848e-279
RPS2	0	-0.421167	1	0.998	0
TNFAIP3	1.12153e-100	-0.423033	0.876	0.947	2.24307e-97
FOXP1	3.55504e-152	-0.423213	0.763	0.885	7.11007e-149
SARAF	2.99737e-222	-0.426108	0.99	0.994	5.99474e-219
RPS6	0	-0.42685	1	1	0
DUSP2	7.99193e-29	-0.427929	0.889	0.929	1.59839e-25
RPL32	0	-0.433435	1	1	0
LINC02446	4.34316e-28	-0.435526	0.766	0.686	8.68631e-25
RPL4	0	-0.440824	0.997	0.999	0
RGS10	5.76608e-130	-0.440845	0.796	0.845	1.15322e-126
RPL18A	0	-0.453774	1	1	0
RPLP0	0	-0.454462	1	0.999	0
CD5	1.44177e-100	-0.454792	0.935	0.878	2.88354e-97
ZFP36L2	1.03944e-147	-0.465786	0.969	0.987	2.07888e-144
COTL1	4.88427e-115	-0.477714	0.962	0.917	9.76855e-112
CXCR4	2.47067e-140	-0.479822	0.852	0.904	4.94134e-137
CD8B	1.07051e-155	-0.488576	0.954	0.89	2.14103e-152
CD6	5.24001e-143	-0.489837	0.865	0.879	1.048e-139
PASK	5.73061e-223	-0.491939	0.908	0.835	1.14612e-219
RPS8	0	-0.497035	1	0.999	0
AQP3	7.70861e-08	-0.504364	0.924	0.743	0.000154172
MAL	6.15985e-53	-0.513345	0.84	0.765	1.23197e-49
LDHB	9.97705e-201	-0.516047	0.92	0.942	1.99541e-197
RPS18	0	-0.517859	1	1	0
RPL13	0	-0.523733	1	1	0
EEF1B2	0	-0.523925	0.998	0.997	0
GZMK	0.870641	-0.529728	0.973	0.866	1
RPS12	0	-0.539089	1	1	0
LEPROTL1	2.40224e-166	-0.543452	0.928	0.947	4.80449e-163
CD27	2.32759e-209	-0.559561	0.64	0.766	4.65519e-206
RCAN3	0	-0.56267	0.966	0.89	0
JUN	8.48017e-150	-0.574987	0.849	0.948	1.69603e-146
PABPC1	0	-0.578726	0.991	0.998	0
TRBV20-1	9.87912e-84	-0.578891	0.273	0.512	1.97582e-80
DNAJB1	2.00693e-252	-0.604652	0.894	0.962	4.01386e-249
NOSIP	1.37719e-184	-0.657851	0.677	0.824	2.75439e-181
NELL2	2.84233e-252	-0.695437	0.981	0.903	5.68467e-249
CAMK4	0	-0.715099	0.716	0.857	0
FLT3LG	0	-0.779677	0.609	0.856	0
IL7R	0	-1.16911	0.898	0.941	0
LTB	0	-1.51128	0.793	0.954	0

## Sheet: naive
	p_val	avg_logFC	pct.1	pct.2	p_val_adj
TRBV20-1	0.000834936	2.09875	0.513	0.505	1
TRBV28	4.08443e-78	2.05026	0.203	0.55	8.16887e-75
TRAV1-2	1.21588e-87	1.99287	0.203	0.62	2.43177e-84
TRBV27	6.48694e-61	1.92261	0.844	0.385	1.29739e-57
TRBV6-5	3.02645e-114	1.72643	0.118	0.428	6.05291e-111
TRAV29DV5	1.11286e-96	1.58361	0.11	0.431	2.22572e-93
TRBV6-4	2.02992e-41	1.54356	0.987	0.717	4.05984e-38
TRBV19	1.25216e-20	1.51689	0.343	0.46	2.50432e-17
TRBV6-2	1.09882e-48	1.48496	0.369	0.612	2.19763e-45
TRBV5-1	0.367049	1.47327	0.769	0.633	1
TRBV4-2	0.70858	1.46569	0.62	0.525	1
TRAV27	4.96171e-36	1.46277	0.262	0.531	9.92343e-33
TRBV4-1	1.71695e-75	1.39561	0.2	0.498	3.43389e-72
TRAV13-1	7.17701e-21	1.35725	0.226	0.393	1.4354e-17
TRBV6-1	2.6895e-15	1.30082	0.646	0.523	5.37899e-12
TRAV38-1	0.139755	1.22832	0.22	0.38	1
TRBV3-1	2.07855e-157	1.20389	0.115	0.528	4.1571e-154
TRAV17	0.111846	1.18343	0.307	0.42	1
TRBV7-9	4.13899e-91	1.17232	0.174	0.527	8.27798e-88
TRAV12-2	0.796243	1.1588	0.395	0.395	1
TRBV12-3	0.0145123	1.14815	0.821	0.707	1
TRBV7-2	6.36752e-23	1.13365	0.503	0.578	1.2735e-19
TRBV7-3	4.3901e-21	1.1274	0.777	0.532	8.7802e-18
TRAV12-3	1.92851e-28	1.1082	0.77	0.479	3.85702e-25
TRAV19	0.106676	1.10567	0.828	0.641	1
S100A9	2.85449e-21	1.09898	0.515	0.569	5.70897e-18
TRAV13-2	1.01097e-143	1.03096	0.133	0.6	2.02193e-140
TRBV9	4.21865e-42	0.992046	0.974	0.76	8.43729e-39
TRAV20	1.58407e-104	0.972019	0.215	0.534	3.16815e-101
TRBV29-1	8.39016e-97	0.965682	0.162	0.519	1.67803e-93
TRBV2	6.16723e-40	0.963665	0.515	0.68	1.23345e-36
TRAV21	2.2177e-24	0.95219	0.313	0.43	4.43539e-21
TRAV8-1	6.75759e-05	0.951073	0.377	0.418	0.135152
TRAV8-4	4.6248e-117	0.909577	0.159	0.549	9.24961e-114
TRAV12-1	4.18901e-175	0.909081	0.951	0.397	8.37802e-172
TRBV15	1.35206e-10	0.879098	0.507	0.596	2.70413e-07
HLA-DRA	4.00566e-08	0.870405	0.895	0.757	8.01132e-05
TRAV14DV4	4.75997e-107	0.853794	0.084	0.471	9.51995e-104
TRBV7-6	0.154514	0.835918	0.77	0.63	1
COTL1	5.95856e-43	0.765651	0.985	0.918	1.19171e-39
TRAV35	3.67533e-53	0.750397	0.251	0.483	7.35065e-50
TRBV25-1	2.3592e-10	0.742911	0.195	0.384	4.71839e-07
TRAV25	1.04748e-05	0.710411	0.718	0.489	0.0209495
TRBV30	4.50072e-48	0.70334	0.352	0.535	9.00145e-45
TRAV41	0.72962	0.700008	0.326	0.348	1
TRBV6-6	3.76783e-122	0.6935	0.982	0.729	7.53566e-119
TRAV26-1	6.68997e-253	0.672878	0.046	0.497	1.33799e-249
RIPOR2	3.70489e-78	0.660637	0.341	0.701	7.40978e-75
TRBV18	0.0303246	0.657655	0.297	0.415	1
CST3	7.85181e-19	0.656005	0.474	0.509	1.57036e-15
HSP90AB1	1.02085e-108	0.64375	0.99	0.98	2.04171e-105
CD55	0.00186629	0.634114	0.972	0.822	1
TRAV38-2DV8	8.04492e-104	0.624458	0.285	0.67	1.60898e-100
AHNAK	5.09684e-42	0.623045	0.989	0.899	1.01937e-38
TRBV5-6	6.61487e-16	0.619661	0.339	0.499	1.32297e-12
TRAV9-2	1.019e-53	0.615022	0.077	0.445	2.03801e-50
BDP1	3.52222e-84	0.613449	0.98	0.684	7.04444e-81
TRAV4	7.94927e-44	0.612449	0.077	0.371	1.58985e-40
TRAV6	5.02005e-16	0.61016	0.766	0.49	1.00401e-12
ARHGAP15	1.06241e-104	0.606356	0.6	0.843	2.12483e-101
NEAT1	1.40676e-09	0.601926	0.684	0.625	2.81352e-06
TRBV14	0.0145949	0.58462	0.625	0.434	1
SMCHD1	4.75478e-06	0.575487	0.974	0.879	0.00950956
DDX21	0.507837	0.56865	0.979	0.857	1
TRAV23DV6	9.6232e-110	0.568111	0.172	0.488	1.92464e-106
TRAV8-6	7.70439e-78	0.565469	0.084	0.415	1.54088e-74
FOSB	7.75887e-23	0.547812	0.062	0.297	1.55177e-19
AIF1	3.00903e-32	0.534601	0.503	0.704	6.01806e-29
PAG1	7.90835e-06	0.531683	0.872	0.777	0.0158167
TRAV26-2	2.8998e-30	0.529198	0.848	0.5	5.79961e-27
STAT1	1.4921e-20	0.528187	0.213	0.491	2.98421e-17
TRAV10	1.1889e-130	0.517618	0.887	0.41	2.3778e-127
TRBV5-4	1.92252e-25	0.514449	0.444	0.552	3.84503e-22
CMC1	0.000583782	0.512532	0.933	0.673	1
SORL1	0.0404083	0.507747	0.831	0.755	1
BTG2	8.98853e-64	0.498975	0.952	0.922	1.79771e-60
ABLIM1	8.10633e-116	0.497028	0.139	0.635	1.62127e-112
LY6E	1.95054e-123	0.496372	0.974	0.93	3.90108e-120
UTRN	0.00275981	0.491068	0.974	0.756	1
CTSS	4.63558e-06	0.490051	0.877	0.701	0.00927115
KCNA3	3.8763e-11	0.48469	0.895	0.635	7.7526e-08
SLC25A5	1.3251e-56	0.478784	0.99	0.884	2.65019e-53
BZW2	1.63825e-66	0.471159	0.175	0.507	3.2765e-63
CDC14A	2.63902e-14	0.4683	0.575	0.619	5.27804e-11
EZR	6.36431e-51	0.458439	0.995	0.957	1.27286e-47
GBP1	3.89831e-10	0.456452	0.156	0.336	7.79661e-07
LEF1	2.4444e-179	0.456191	0.11	0.659	4.88881e-176
RCAN3	0.00452475	0.452744	0.99	0.891	1
TRAV16	6.32428e-164	0.44635	0.072	0.579	1.26486e-160
FKBP11	6.23083e-06	0.442495	0.964	0.774	0.0124617
LCP1	1.07004e-110	0.44248	0.916	0.914	2.14009e-107
IL6ST	1.90336e-23	0.441872	0.964	0.832	3.80673e-20
GAPDH	2.17262e-131	0.439875	0.941	0.999	4.34524e-128
KMT2C	0.0234181	0.432167	0.893	0.692	1
IL7R	5.05133e-125	0.43187	0.241	0.947	1.01027e-121
HSPD1	5.46267e-83	0.429764	0.197	0.619	1.09253e-79
CRIP1	3.57604e-132	0.428684	0.73	0.912	7.15209e-129
NME2	2.22983e-120	0.424082	0.987	0.93	4.45966e-117
BEX2	2.79743e-09	0.422426	0.982	0.857	5.59485e-06
TOB1	1.4434e-05	0.42079	0.975	0.805	0.0288679
RB1CC1	4.21159e-27	0.418966	0.607	0.68	8.42318e-24
CD7	1.54164e-125	0.416811	0.864	0.903	3.08327e-122
FYB1	1.32389e-96	0.416708	0.813	0.858	2.64777e-93
PASK	4.45324e-08	0.416604	0.992	0.836	8.90649e-05
LYST	1.46531e-24	0.415548	0.987	0.817	2.93062e-21
CANX	8.46942e-15	0.414989	0.785	0.747	1.69388e-11
TRAV24	9.01593e-56	0.413377	0.184	0.45	1.80319e-52
UBTF	2.15506e-47	0.411061	0.251	0.553	4.31012e-44
EIF2S3	3.30647e-70	0.40914	0.748	0.83	6.61294e-67
MT1E	1.41624e-73	0.408066	0.382	0.694	2.83248e-70
FOS	1.27668e-134	0.407827	0.156	0.75	2.55336e-131
NBPF26	1.28162e-48	0.405569	0.408	0.668	2.56325e-45
ARL4C	1.04482e-45	0.403369	0.921	0.798	2.08964e-42
APBA2	1.87189e-23	0.398814	0.31	0.486	3.74378e-20
LTBP4	4.99079e-48	0.39826	0.39	0.636	9.98157e-45
MYH9	4.82957e-104	0.397567	0.8	0.898	9.65914e-101
TRBV12-4	4.45939e-14	0.395774	0.574	0.61	8.91878e-11
SETX	0.017213	0.394426	0.646	0.575	1
IRF1	8.17375e-64	0.394305	0.21	0.63	1.63475e-60
TRAV1-1	0.362086	0.393627	0.51	0.501	1
MYC	1.92494e-110	0.392231	0.233	0.692	3.84988e-107
SPN	6.70273e-13	0.386565	0.872	0.508	1.34055e-09
CAPG	6.08469e-17	0.383312	0.964	0.748	1.21694e-13
TYROBP	3.55091e-12	0.38146	0.813	0.584	7.10182e-09
RORA	1.73084e-55	0.38122	0.892	0.834	3.46167e-52
C6orf48	3.27966e-61	0.380833	0.779	0.801	6.55933e-58
GLRX	5.83759e-40	0.379787	0.161	0.5	1.16752e-36
SACS	0.706844	0.3797	0.928	0.663	1
TAF1D	2.18226e-32	0.376639	0.693	0.758	4.36452e-29
TNFAIP3	7.73204e-137	0.376406	0.948	0.945	1.54641e-133
RHOH	1.45299e-27	0.376164	0.972	0.895	2.90599e-24
ITGA4	2.83523e-19	0.375352	0.893	0.77	5.67047e-16
SYNE1	0.000846967	0.373474	0.854	0.605	1
ANXA2	2.68038e-134	0.370648	0.256	0.774	5.36076e-131
TRIM69	2.95868e-07	0.3664	0.497	0.387	0.000591735
PRRC2B	1.14482e-44	0.364312	0.407	0.633	2.28964e-41
TRAV2	4.18276e-65	0.361835	0.216	0.531	8.36551e-62
LINC02446	1.6885e-93	0.361817	0.38	0.691	3.377e-90
TRAV5	3.18801e-17	0.360716	0.144	0.332	6.37602e-14
NDFIP1	9.3173e-78	0.359786	0.748	0.821	1.86346e-74
TRAV8-3	7.73105e-07	0.355568	0.646	0.496	0.00154621
KLRB1	5.25315e-05	0.351289	0.998	0.949	0.105063
DDX3X	2.27834e-50	0.343352	0.543	0.683	4.55667e-47
TRAV39	0.400849	0.343297	0.923	0.626	1
FKBP5	0.221691	0.34139	0.298	0.426	1
CRYBG1	5.26382e-29	0.340859	0.818	0.812	1.05276e-25
LGALS3BP	1.48446e-35	0.33982	0.895	0.543	2.96893e-32
TRADD	9.16324e-37	0.339349	0.531	0.618	1.83265e-33
JAML	2.54959e-87	0.338572	0.097	0.548	5.09919e-84
WDR74	7.6491e-17	0.33834	0.939	0.683	1.52982e-13
SPTAN1	8.60251e-52	0.337275	0.48	0.684	1.7205e-48
JPT1	3.60374e-06	0.337274	0.434	0.514	0.00720749
TNRC6C	5.2862e-08	0.336544	0.384	0.441	0.000105724
EIF3E	5.41347e-168	0.336278	0.713	0.938	1.08269e-164
ODF2L	1.82615e-64	0.333677	0.231	0.602	3.6523e-61
OXNAD1	3.12773e-107	0.333027	0.4	0.717	6.25546e-104
CEMIP2	0.0867292	0.328286	0.979	0.807	1
CCR7	2.68651e-188	0.327061	0.09	0.575	5.37301e-185
IFI6	6.90664e-30	0.327035	0.492	0.677	1.38133e-26
RNF213	3.04185e-161	0.32668	0.162	0.759	6.0837e-158
GNG2	1.86643e-12	0.326116	0.934	0.792	3.73285e-09
TC2N	7.11348e-166	0.326099	0.126	0.714	1.4227e-162
FCER1G	1.362e-134	0.324565	0.115	0.473	2.724e-131
TRAV36DV7	1.82321e-48	0.323589	0.793	0.529	3.64642e-45
PECAM1	8.12146e-13	0.323539	0.102	0.355	1.62429e-09
MAP3K1	1.39451e-71	0.32171	0.907	0.535	2.78902e-68
IFRD1	3.37737e-12	0.321073	0.954	0.781	6.75475e-09
ATF7IP	7.38468e-33	0.320842	0.767	0.738	1.47694e-29
TCF7	1.02443e-166	0.31943	0.152	0.716	2.04887e-163
NFKB1	5.72001e-27	0.316865	0.946	0.671	1.144e-23
BIRC6	1.17905e-09	0.316756	0.854	0.704	2.35809e-06
RPL27A	3.24855e-111	0.316568	0.977	0.991	6.4971e-108
MT2A	1.67852e-173	0.316298	0.21	0.834	3.35704e-170
ATP8A1	8.39347e-43	0.316016	0.938	0.709	1.67869e-39
USP36	3.12198e-21	0.31503	0.995	0.913	6.24395e-18
CD74	1.23002e-124	0.314162	0.79	0.967	2.46004e-121
TIMP1	0.486327	0.312511	0.974	0.753	1
CHD7	1.52208e-141	0.311023	0.972	0.692	3.04417e-138
VPS13C	0.00804322	0.310709	0.9	0.71	1
ERN1	1.19804e-68	0.31064	0.28	0.647	2.39609e-65
ACTN1	2.61644e-38	0.310638	0.257	0.492	5.23289e-35
LINC02273	2.41861e-54	0.308658	0.177	0.443	4.83723e-51
CDC25B	4.37467e-141	0.308166	0.152	0.697	8.74935e-138
CRTAM	7.01746e-11	0.307351	0.557	0.614	1.40349e-07
LEPROTL1	2.3238e-117	0.306215	0.905	0.947	4.6476e-114
TMEM131L	3.6779e-05	0.304964	0.564	0.53	0.073558
G3BP2	1.89448e-28	0.304674	0.97	0.923	3.78896e-25
BAX	2.82985e-37	0.304603	0.898	0.767	5.65971e-34
OFD1	0.556447	0.304304	0.857	0.696	1
LRRN3	2.08007e-57	0.302869	0.148	0.43	4.16013e-54
C16orf54	1.0824e-24	0.302148	0.193	0.435	2.16481e-21
SMC1A	9.72935e-58	0.300112	0.085	0.445	1.94587e-54
ID2	6.75146e-45	0.298381	0.941	0.806	1.35029e-41
STMN1	1.90255e-18	0.297936	0.098	0.397	3.80511e-15
CYB561	0.0281333	0.296002	0.92	0.689	1
IL4R	0.000171051	0.29345	0.91	0.782	0.342102
ZFP36	4.6039e-112	0.292343	0.998	0.955	9.20779e-109
SNN	2.77056e-113	0.291512	0.884	0.602	5.54113e-110
MIS18BP1	2.62686e-08	0.29119	0.861	0.735	5.25373e-05
REL	0.210731	0.289318	0.995	0.94	1
VSIR	3.89281e-70	0.289219	0.443	0.7	7.78562e-67
AC016831.7	0.242247	0.288611	0.962	0.857	1
GIMAP4	4.09622e-154	0.288182	0.075	0.556	8.19243e-151
SQSTM1	6.62803e-58	0.287837	0.989	0.914	1.32561e-54
CNOT6L	3.61967e-05	0.28778	0.918	0.771	0.0723935
LARP1B	2.28735e-43	0.287026	0.348	0.636	4.5747e-40
PRNP	2.531e-12	0.284202	0.992	0.869	5.06199e-09
SIRPG	6.906e-71	0.283718	0.274	0.583	1.3812e-67
CAST	1.29643e-42	0.283685	0.979	0.911	2.59287e-39
CLUAP1	6.73779e-06	0.283398	0.561	0.461	0.0134756
ANKRD17	2.32086e-16	0.282876	0.533	0.619	4.64171e-13
FAS	5.614e-120	0.28184	0.959	0.674	1.1228e-116
EML4	6.1644e-76	0.280069	0.998	0.977	1.23288e-72
LGALS9	8.86262e-18	0.278607	0.625	0.654	1.77252e-14
GIMAP1	1.41071e-146	0.277318	0.062	0.498	2.82141e-143
BCL2	1.76642e-107	0.276859	0.108	0.597	3.53283e-104
RHBDF2	8.52449e-06	0.275888	0.869	0.667	0.017049
TGFBR2	6.47321e-71	0.274641	0.172	0.591	1.29464e-67
HOPX	2.1895e-41	0.274579	0.889	0.843	4.37901e-38
ITPR2	1.26196e-74	0.27331	0.205	0.565	2.52393e-71
PLEC	4.5131e-58	0.273298	0.328	0.609	9.0262e-55
TMEM123	1.12895e-126	0.272253	0.6	0.868	2.25789e-123
CDK6	0.0366254	0.272234	0.777	0.619	1
PDK1	7.52251e-59	0.272059	0.189	0.562	1.5045e-55
ATP2B1	8.17938e-95	0.270222	0.964	0.595	1.63588e-91
SLC2A3	4.40091e-32	0.269652	0.949	0.86	8.80182e-29
SH3BP5	1.80911e-150	0.268015	0.09	0.555	3.61822e-147
ZNF101	1.98165e-214	0.267513	0.062	0.576	3.9633e-211
XBP1	7.77758e-80	0.266468	0.643	0.786	1.55552e-76
SRGN	6.1097e-120	0.264856	0.928	0.94	1.22194e-116
MRPS31	0.561164	0.264533	0.254	0.354	1
WHRN	4.47831e-43	0.263154	0.98	0.726	8.95662e-40
TTC14	1.97124e-07	0.261682	0.644	0.585	0.000394248
RNF125	1.60445e-08	0.261241	0.99	0.879	3.2089e-05
SETD7	1.84273e-25	0.260834	0.941	0.844	3.68547e-22
RASA1	2.79935e-61	0.259107	0.857	0.521	5.5987e-58
LARS	1.14385e-34	0.257605	0.352	0.532	2.28769e-31
IGF1R	2.73136e-109	0.255734	0.931	0.588	5.46273e-106
POLR2A	0.121647	0.255272	0.846	0.658	1
CYLD	4.73037e-60	0.255227	0.708	0.751	9.46075e-57
BLK	0.0013944	0.254364	0.828	0.634	1
TRAV8-2	1.04781e-08	0.253479	0.362	0.415	2.09563e-05
MACF1	1.32058e-79	0.252952	0.331	0.681	2.64116e-76
RGCC	5.54672e-11	0.252879	0.848	0.68	1.10934e-07
CLEC2D	7.58969e-130	0.25195	0.085	0.627	1.51794e-126
CCND2	3.8621e-25	0.251391	0.615	0.631	7.72419e-22
SLFN5	8.32335e-77	0.250562	0.064	0.534	1.66467e-73
TBX21	1.92264e-71	0.250551	0.938	0.634	3.84529e-68
HSPB1	1.01096e-224	-0.250456	0.108	0.696	2.02193e-221
PHPT1	6.43507e-78	-0.251409	0.613	0.719	1.28701e-74
S100A6	4.39815e-183	-0.252456	0.505	0.992	8.7963e-180
BTG3	3.35748e-06	-0.265537	0.993	0.946	0.00671495
H3F3B	3.49096e-134	-0.266451	1	1	6.98192e-131
ARPC5L	6.33074e-39	-0.26828	0.949	0.806	1.26615e-35
PLSCR1	0	-0.268535	0.023	0.599	0
S1PR5	2.1345e-07	-0.272191	0.567	0.673	0.0004269
DUSP2	2.16322e-168	-0.276666	0.507	0.932	4.32643e-165
CTSW	4.11329e-209	-0.294744	0.944	0.98	8.22658e-206
LPIN2	1.71649e-182	-0.304027	0.051	0.622	3.43298e-179
TNFRSF1B	3.35254e-35	-0.309923	0.8	0.752	6.70509e-32
CDK2AP2	1.02613e-167	-0.315245	0.013	0.398	2.05227e-164
IER2	3.53465e-214	-0.318796	0.666	0.939	7.06929e-211
RHOC	9.51693e-74	-0.325466	0.454	0.754	1.90339e-70
NOSIP	1.93305e-254	-0.330975	0.113	0.827	3.86611e-251
PRDM1	9.56261e-90	-0.331723	0.557	0.826	1.91252e-86
IL10RA	4.11781e-159	-0.33617	0.139	0.762	8.23561e-156
S100A4	6.00842e-141	-0.348118	0.261	0.985	1.20168e-137
DDIT4	7.86846e-127	-0.358618	0.441	0.778	1.57369e-123
ZFP36L1	3.6418e-134	-0.37937	0.98	0.944	7.28359e-131
SH3BGRL3	1.69447e-142	-0.390749	0.279	0.996	3.38895e-139
GZMB	0.0393943	-0.513715	0.946	0.727	1
GZMH	0.0152509	-0.539617	0.908	0.739	1
CCL5	1.8145e-127	-0.590549	0.598	0.968	3.62901e-124
FGFBP2	8.54546e-26	-0.618615	0.846	0.509	1.70909e-22
NKG7	2.5841e-168	-0.802796	0.316	0.893	5.1682e-165
GNLY	5.97698e-35	-1.12408	0.79	0.892	1.1954e-31

## Sheet: (9) Trm
	p_val	avg_logFC	pct.1	pct.2	p_val_adj
ZNF683	1.83241e-143	1.48982	0.921	0.688	3.66483e-140
CD7	1.11895e-142	0.92227	0.987	0.902	2.2379e-139
DUSP2	1.01253e-97	0.905762	1	0.928	2.02505e-94
KLRC3	1.90966e-50	0.904634	0.804	0.874	3.81931e-47
KLRC2	4.81025e-66	0.754513	0.76	0.583	9.62049e-63
NCR3	7.3037e-65	0.735185	0.849	0.708	1.46074e-61
FXYD2	3.73644e-97	0.715246	0.939	0.862	7.47287e-94
LEF1	5.29995e-54	0.673937	0.847	0.653	1.05999e-50
TRG-AS1	1.31565e-82	0.667508	0.86	0.534	2.6313e-79
STK17A	6.14201e-42	0.629514	0.936	0.809	1.2284e-38
FXYD7	5.13314e-45	0.582811	0.885	0.851	1.02663e-41
LINC02446	2.36952e-13	0.577684	0.74	0.688	4.73904e-10
CD300A	8.00942e-44	0.558931	0.76	0.529	1.60188e-40
JUNB	3.61282e-55	0.55846	0.992	0.97	7.22565e-52
IFITM3	1.45869e-14	0.549161	0.745	0.77	2.91737e-11
TCF7	2.36248e-31	0.539303	0.809	0.71	4.72495e-28
PIK3R1	6.05541e-31	0.534725	0.992	0.969	1.21108e-27
FOS	1.71476e-31	0.525783	0.867	0.743	3.42953e-28
DUSP1	9.69854e-45	0.518818	0.952	0.915	1.93971e-41
IKZF2	9.79939e-42	0.512982	0.722	0.615	1.95988e-38
ZFP36L2	1.76073e-64	0.50669	0.997	0.987	3.52146e-61
KIR3DL2	4.84141e-71	0.502688	0.798	0.677	9.68283e-68
FCRL3	8.396e-31	0.501714	0.686	0.441	1.6792e-27
NR4A2	4.91295e-27	0.499981	0.952	0.9	9.8259e-24
XCL1	2.44544e-14	0.495966	0.615	0.443	4.89088e-11
IL2RB	2.26021e-16	0.487974	0.686	0.602	4.52043e-13
GATA3	2.78191e-43	0.473607	0.977	0.882	5.56382e-40
TUBA4A	2.61996e-30	0.472813	0.898	0.723	5.23991e-27
KLRD1	1.79588e-15	0.470856	0.689	0.648	3.59175e-12
SPINT2	6.67897e-20	0.467405	0.763	0.766	1.33579e-16
PLAC8	2.30538e-10	0.467146	0.727	0.742	4.61076e-07
CTSW	1.51183e-51	0.450895	0.987	0.979	3.02366e-48
TRGV10	0.635778	0.449284	0.587	0.651	1
IFITM1	9.70444e-59	0.446409	1	0.986	1.94089e-55
SOX4	9.46683e-63	0.4262	0.791	0.816	1.89337e-59
IER2	1.39248e-27	0.424339	0.941	0.936	2.78496e-24
LYAR	2.87277e-19	0.422131	0.916	0.926	5.74555e-16
HSPB1	3.30588e-19	0.421339	0.781	0.69	6.61176e-16
HIST1H1E	1.50861e-17	0.419231	0.974	0.953	3.01721e-14
FCRL6	2.71114e-32	0.419027	0.727	0.451	5.42228e-29
ITGB2	6.00445e-37	0.416989	0.959	0.866	1.20089e-33
CRIP2	5.05685e-11	0.415728	0.717	0.784	1.01137e-07
MAPRE2	4.41994e-13	0.413686	0.778	0.687	8.83987e-10
TRGV4	0.0569741	0.393507	0.452	0.516	1
NUCB2	1.84103e-13	0.392324	0.724	0.725	3.68206e-10
RTKN2	6.48771e-27	0.38946	0.666	0.59	1.29754e-23
CEBPB	3.29688e-29	0.385	0.76	0.454	6.59376e-26
LMNA	1.71349e-43	0.383868	0.862	0.84	3.42698e-40
UCP2	5.79977e-18	0.382555	0.791	0.676	1.15995e-14
VSIR	5.61165e-20	0.378455	0.862	0.696	1.12233e-16
EZR	9.79591e-19	0.376969	0.969	0.957	1.95918e-15
SQSTM1	2.98757e-15	0.374759	0.972	0.914	5.97514e-12
IFITM2	1.13255e-38	0.371258	0.985	0.925	2.26509e-35
SLC25A5	5.21027e-19	0.36538	0.974	0.884	1.04205e-15
JUND	3.34482e-38	0.363653	0.952	0.824	6.68965e-35
TRGV7	7.22293e-99	0.362983	0.862	0.526	1.44459e-95
PPP2R5C	7.11586e-12	0.36267	0.819	0.862	1.42317e-08
REL	4.99767e-19	0.360431	0.969	0.94	9.99535e-16
CD27	2.85548e-12	0.359587	0.788	0.762	5.71095e-09
ZNF331	2.1737e-17	0.359269	0.911	0.897	4.34741e-14
TPST2	2.02616e-08	0.358917	0.622	0.532	4.05232e-05
TRGV3	1.47953e-57	0.355487	0.806	0.602	2.95905e-54
AC012615.1	3.1308e-55	0.353604	0.888	0.658	6.26159e-52
IL21R	2.43163e-22	0.351858	0.804	0.789	4.86326e-19
AOAH	1.0419e-34	0.3475	0.88	0.775	2.0838e-31
CEMIP2	3.83515e-21	0.344874	0.906	0.808	7.6703e-18
C11orf21	6.57358e-24	0.340608	0.714	0.574	1.31472e-20
TUBB4B	3.88118e-44	0.339479	0.936	0.76	7.76236e-41
HSBP1L1	2.0789e-30	0.332493	0.801	0.71	4.15781e-27
ANXA6	3.89955e-17	0.327449	0.865	0.773	7.79909e-14
SLC9A3R1	1.12806e-12	0.32081	0.814	0.69	2.25612e-09
FTH1	3.4538e-31	0.319684	1	1	6.90761e-28
ITGB2-AS1	4.09051e-18	0.318399	0.77	0.641	8.18101e-15
KLF3	4.19663e-10	0.318003	0.806	0.793	8.39326e-07
NCF1	8.44882e-08	0.317608	0.727	0.7	0.000168976
DSTN	1.17043e-16	0.31676	0.872	0.755	2.34087e-13
ACTN1	4.05968e-05	0.316722	0.546	0.489	0.0811936
ITGAM	0.00474394	0.315852	0.561	0.583	1
CHST2	1.83204e-147	0.314619	0.89	0.507	3.66408e-144
S100A10	2.44593e-20	0.313141	0.987	0.969	4.89186e-17
PI16	0.746321	0.309346	0.533	0.746	1
RUNX3	1.31777e-21	0.306833	0.964	0.924	2.63555e-18
MATK	9.83368e-16	0.305896	0.791	0.694	1.96674e-12
GNLY	3.14425e-10	0.305619	0.878	0.892	6.2885e-07
PPP1R15A	6.28545e-08	0.301461	0.778	0.807	0.000125709
PTP4A1	1.98095e-11	0.299618	0.926	0.938	3.96189e-08
TRGV2	0.41434	0.294774	0.638	0.767	1
H3F3B	5.4692e-36	0.29453	1	1	1.09384e-32
ITPRIP	2.55041e-71	0.294025	0.921	0.654	5.10081e-68
HOPX	6.6351e-07	0.288184	0.867	0.843	0.00132702
AREG	0.031034	0.285012	0.561	0.749	1
INF2	5.31785e-05	0.283976	0.597	0.576	0.106357
LTB	1.09441e-15	0.281889	0.977	0.949	2.18882e-12
TGFB1	4.64755e-11	0.280976	0.959	0.89	9.29509e-08
TRGC2	0.00561289	0.28079	0.574	0.611	1
PARP8	5.10326e-10	0.279882	0.906	0.847	1.02065e-06
ARL4C	1.08974e-11	0.275628	0.842	0.799	2.17949e-08
IRF1	2.89486e-08	0.273704	0.73	0.625	5.78973e-05
LITAF	2.37855e-17	0.273662	0.969	0.954	4.75711e-14
TRBV7-9	1.48929e-11	0.273076	0.676	0.523	2.97859e-08
LSR	2.15884e-28	0.273065	0.814	0.713	4.31768e-25
GADD45B	3.29951e-08	0.272961	0.875	0.847	6.59901e-05
PYROXD2	4.94319e-63	0.271648	0.768	0.477	9.88638e-60
MMP25-AS1	0.000171553	0.270464	0.633	0.57	0.343106
RASSF1	3.55394e-07	0.266819	0.781	0.768	0.000710788
H2AFJ	3.06964e-13	0.264673	0.867	0.784	6.13929e-10
GCSAM	3.46013e-51	0.263477	0.758	0.517	6.92027e-48
TIMP1	0.0164746	0.262924	0.699	0.756	1
FAM177A1	1.38283e-06	0.261773	0.954	0.942	0.00276567
SRGN	7.11871e-12	0.260737	0.954	0.94	1.42374e-08
CLU	4.27282e-160	0.260016	0.923	0.646	8.54564e-157
RELB	2.50088e-13	0.258029	0.936	0.877	5.00177e-10
ARHGAP15	5.79463e-13	0.257562	0.89	0.84	1.15893e-09
LDLRAP1	0.0300232	0.256575	0.543	0.542	1
TRBV20-1	2.97243e-07	0.254702	0.62	0.504	0.000594485
TRBV10-3	2.53264e-19	0.254498	0.357	0.501	5.06527e-16
ID3	0.0217174	0.253233	0.546	0.785	1
TXK	0.0483192	0.253086	0.653	0.734	1
ATG2A	4.66561e-11	0.252359	0.929	0.913	9.33123e-08
MT-ND6	1.43537e-08	0.251198	0.982	0.942	2.87073e-05
FAM173A	0.00112135	0.250504	0.622	0.598	1
LAIR1	0.000545031	0.250214	0.416	0.312	1
THEMIS	0.621387	-0.250358	0.449	0.452	1
SASH3	4.69934e-27	-0.253726	0.316	0.575	9.39868e-24
RPS18	7.5769e-47	-0.256072	1	1	1.51538e-43
TOB1	0.00144223	-0.262824	0.844	0.807	1
TGFBR3	5.23179e-14	-0.267886	0.724	0.757	1.04636e-10
LINC00861	2.93051e-19	-0.271043	0.372	0.58	5.86102e-16
S1PR5	0.136957	-0.271722	0.638	0.673	1
RPL3	5.90001e-72	-0.284383	1	1	1.18e-68
NFKBIZ	6.2812e-22	-0.284423	0.911	0.916	1.25624e-18
LAG3	2.86868e-38	-0.285572	0.758	0.803	5.73736e-35
RPS2	3.44978e-62	-0.292947	1	0.998	6.89956e-59
LGALS1	2.99729e-13	-0.293373	0.987	0.905	5.99457e-10
SYNE1	5.20711e-10	-0.29592	0.548	0.608	1.04142e-06
PAG1	1.31777e-20	-0.301762	0.719	0.778	2.63553e-17
CST7	0.239813	-0.302332	0.977	0.969	1
ALOX5AP	5.72951e-23	-0.303381	0.571	0.732	1.1459e-19
ADGRG1	9.46415e-11	-0.305512	0.462	0.495	1.89283e-07
CYTOR	1.23603e-07	-0.305755	0.712	0.73	0.000247205
GLIPR1	5.28633e-25	-0.311469	0.429	0.623	1.05727e-21
CD6	6.45944e-15	-0.312226	0.862	0.878	1.29189e-11
CCR7	6.77738e-74	-0.314018	0.14	0.573	1.35548e-70
ODC1	1.4932e-21	-0.318149	0.89	0.898	2.9864e-18
CTSC	1.39442e-13	-0.318945	0.482	0.578	2.78884e-10
S100B	3.18126e-104	-0.320923	0.046	0.5	6.36252e-101
ZEB2	0.00190669	-0.326884	0.719	0.756	1
ARPC1B	2.17275e-21	-0.329756	0.75	0.881	4.34551e-18
CD2	1.5807e-24	-0.331392	0.51	0.746	3.1614e-21
RPLP1	3.33885e-62	-0.332682	1	1	6.67769e-59
FYN	1.79712e-20	-0.33621	0.76	0.881	3.59424e-17
FKBP11	9.00871e-18	-0.338628	0.763	0.776	1.80174e-14
GIMAP7	2.22585e-24	-0.344833	0.393	0.628	4.45171e-21
PRDM1	1.99344e-15	-0.350354	0.867	0.823	3.98688e-12
AQP3	8.07924e-07	-0.364641	0.709	0.749	0.00161585
CMC1	1.53154e-09	-0.377016	0.594	0.676	3.06307e-06
EEF1G	1.02449e-47	-0.379595	0.99	0.997	2.04898e-44
EFHD2	3.99236e-48	-0.383141	0.27	0.588	7.98472e-45
PRF1	1.00058e-29	-0.3886	0.278	0.517	2.00117e-26
GZMM	3.4064e-24	-0.399745	0.77	0.903	6.8128e-21
GZMK	1.05503e-23	-0.413054	0.589	0.871	2.11006e-20
COTL1	1.66675e-27	-0.456529	0.847	0.919	3.3335e-24
CD8B	1.21475e-25	-0.458293	0.867	0.892	2.42949e-22
RORA	9.03772e-24	-0.460035	0.913	0.834	1.80754e-20
TTC39C	3.07868e-43	-0.467946	0.753	0.875	6.15735e-40
HLA-DPB1	4.11019e-27	-0.481794	0.513	0.709	8.22038e-24
CCL5	2.61671e-20	-0.490893	0.86	0.965	5.23341e-17
HLA-DRB1	0.133091	-0.559651	0.73	0.622	1
HLA-DPA1	4.86187e-34	-0.591699	0.615	0.76	9.72374e-31
CCL4	0.00784509	-0.59704	0.75	0.73	1
GZMB	0.790828	-0.780964	0.783	0.729	1
FGFBP2	0.00197965	-0.804463	0.707	0.511	1
NKG7	3.43725e-14	-1.00093	0.844	0.888	6.8745e-11
GZMA	6.26168e-122	-1.07873	0.217	0.777	1.25234e-118
GZMH	3.994e-36	-1.28897	0.543	0.741	7.988e-33
KLRB1	1.15129e-28	-1.32184	0.964	0.95	2.30258e-25

[truncated: 1 more sheets: (10) IFN activated]
